# Supplementary material for: Pentaketides and 5-p-Hydroxyphenyl-2-pyridone Derivative from the Culture Extract of a Marine Sponge-Associated Fungus Hamigera avellanea KUFA0732
Source: MDPI journal article supplement (doi:10.3390/md21060344), 2023-06-02
Supplement: s1 [file s1]

## **Supplementary Materials**

**Pentaketides and 5-*p*-Hydroxyphenyl-2-pyridone Derivative from  
the Culture Extract of a Marine Sponge-Associated Fungus  
*Hamigera avellanea* KUFA0732**

**Figure S1.**  $^1\text{H}$  NMR spectrum of **1** ( $\text{DMSO-d}_6$ , 300 MHz).

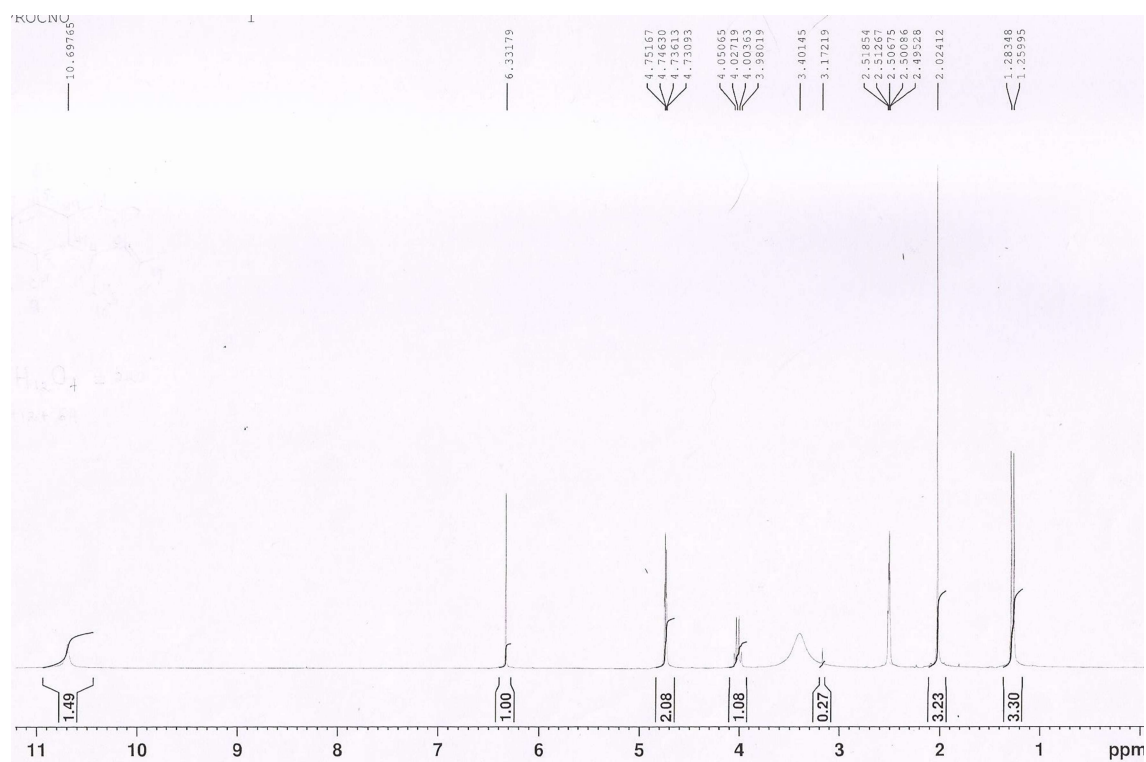

**Figure S2.**  $^{13}\text{C}$  NMR spectrum of **1** ( $\text{DMSO-d}_6$ , 75 MHz).

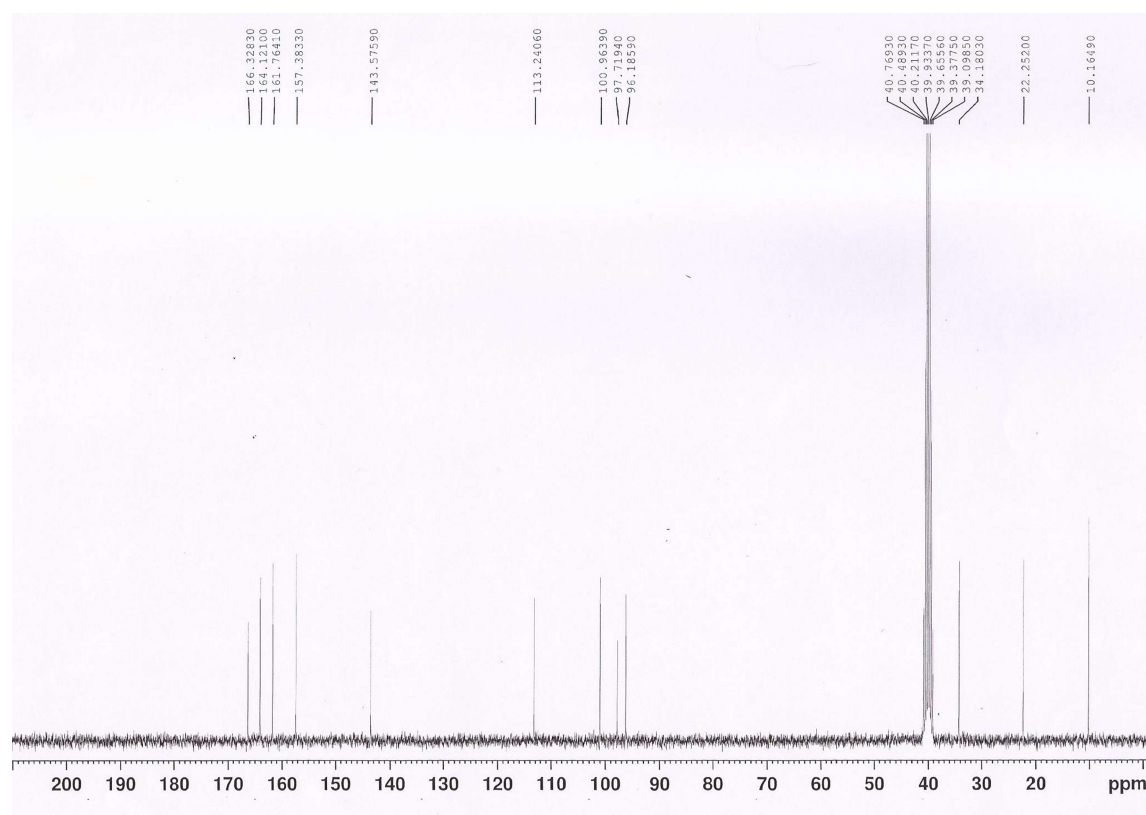

**Figure S3.** COSY spectrum of **1** (DMSO<sub>d6</sub>, 300 MHz).

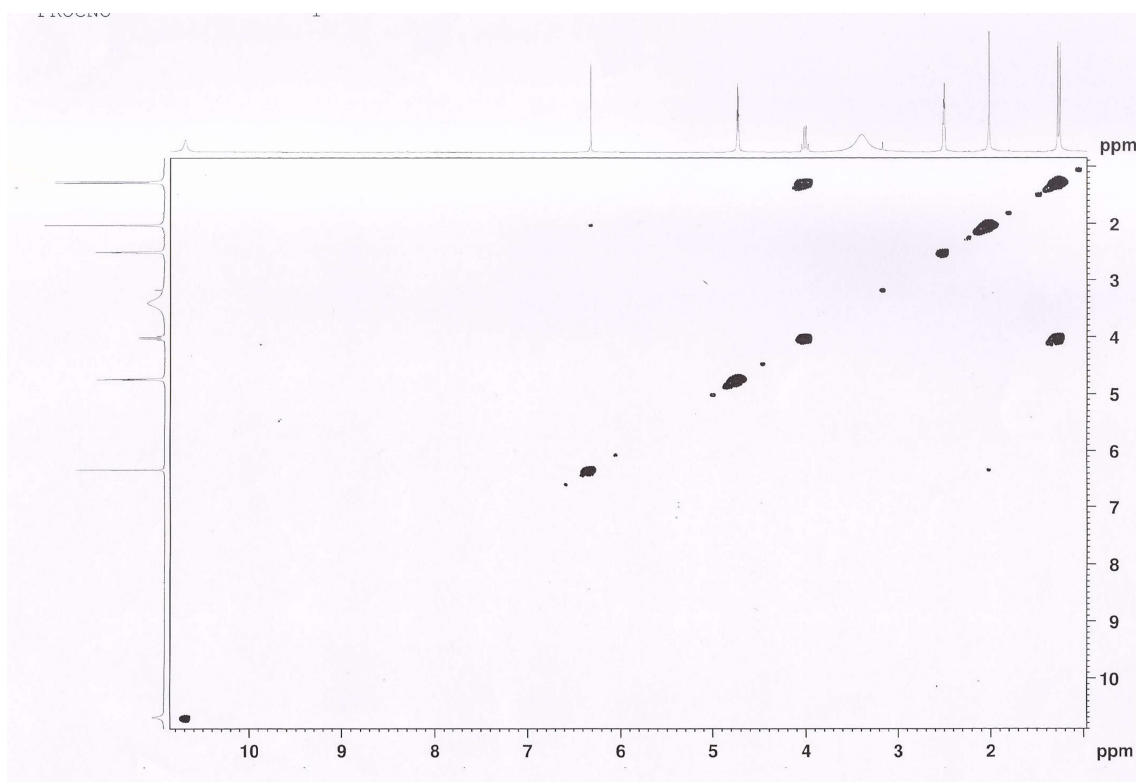

**Figure S4.** HSQC spectrum of **1** (DMSO<sub>d6</sub>, 300 MHz).

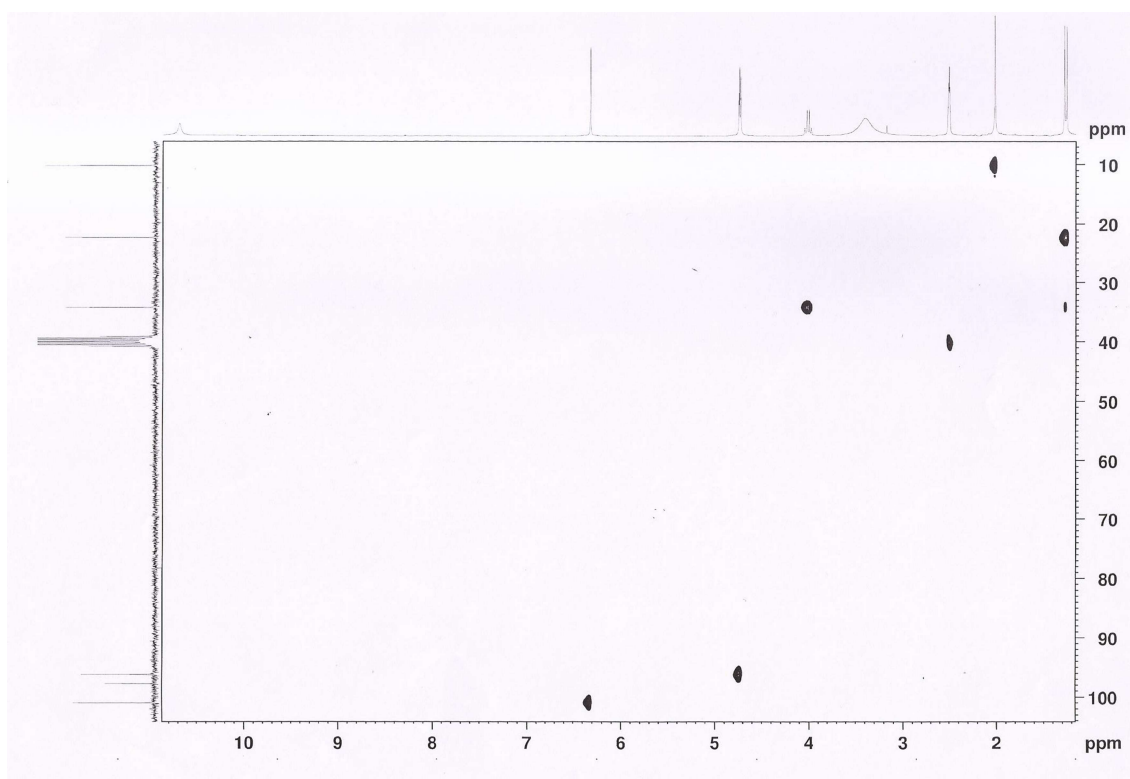

**Figure S5.** HMBC spectrum of **1** (DMSO<sub>d6</sub>, 300 MHz).

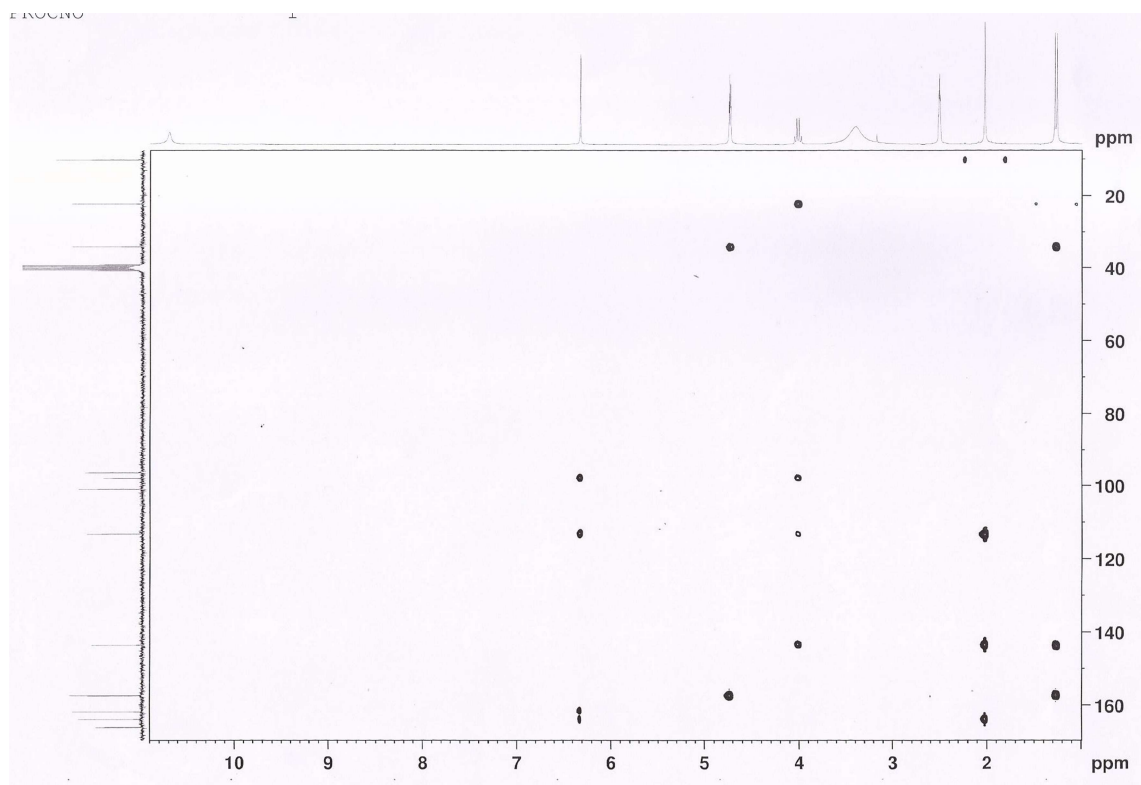

**Figure S6.** (+)-HRESIMS spectrum of **1**

#### Elemental Composition Report [MH]<sup>+</sup>

Single Mass Analysis

Tolerance = 5.0 PPM / DBE: min = -1.5, max = 100.0

Element prediction: Off

Number of isotope peaks used for i-FIT = 3

Monoisotopic Mass, Even Electron Ions

13 formula(e) evaluated with 1 results within limits (up to 100 closest results for each mass)

Elements Used:

C: 12-12 H: 0-150 O: 0-30

Minimum: -1.5

Maximum: 5.0 5.0 100.0

| Mass     | Calc. Mass | mDa | PPM | DBE | i-FIT | Norm | Conf(%) | Formula    |
|----------|------------|-----|-----|-----|-------|------|---------|------------|
| 221.0814 | 221.0814   | 0.0 | 0.0 | 6.5 | 515.2 | n/a  | n/a     | C12 H13 O4 |

AK-HSR 39-46  
ANAKE-G2-227 237 (1.949)

1: TOF MS ES+  
1.44e+007

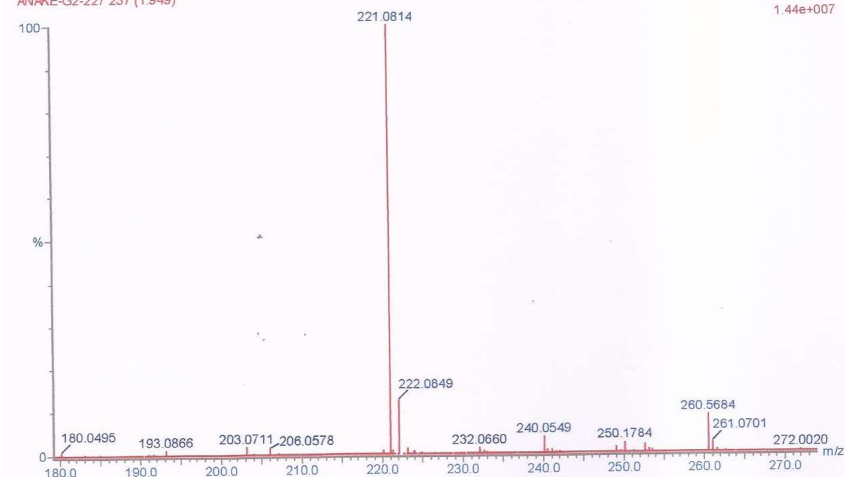



**Figure S7.**  $^1\text{H}$  NMR spectrum of **2** ( $\text{CDCl}_3$ , 300 MHz).

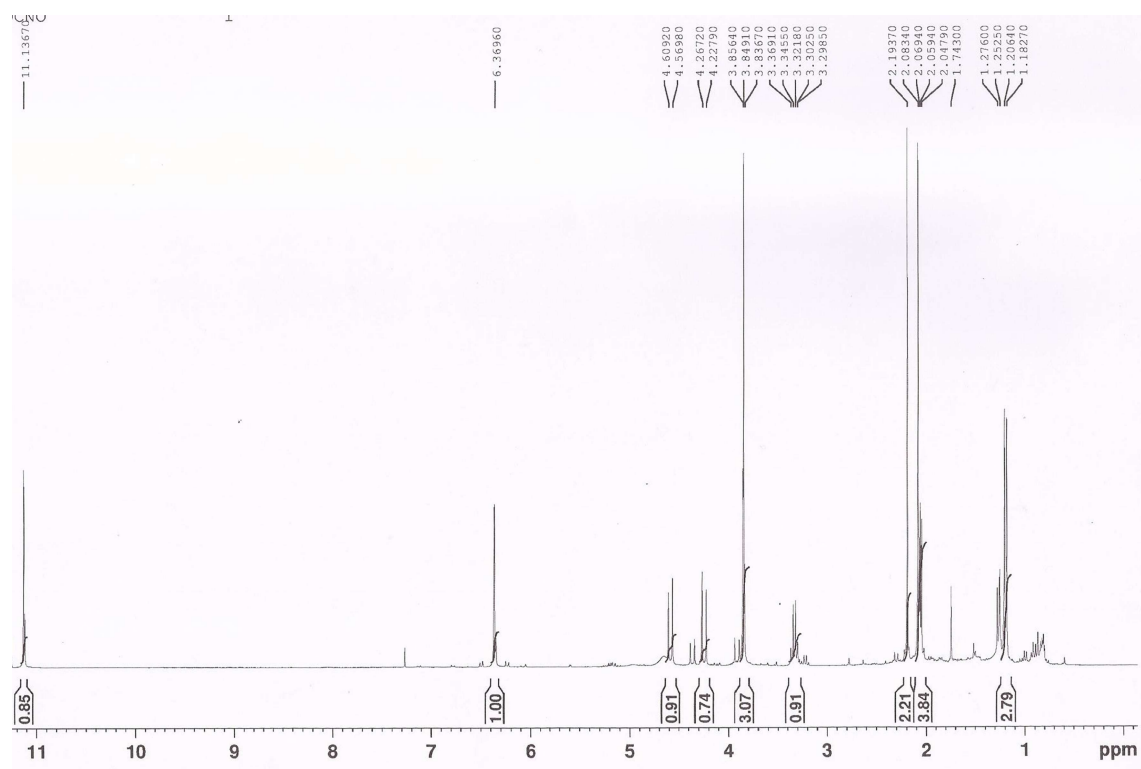

**Figure S8.**  $^{13}\text{C}$  NMR spectrum of **2** ( $\text{CDCl}_3$ , 75 MHz).

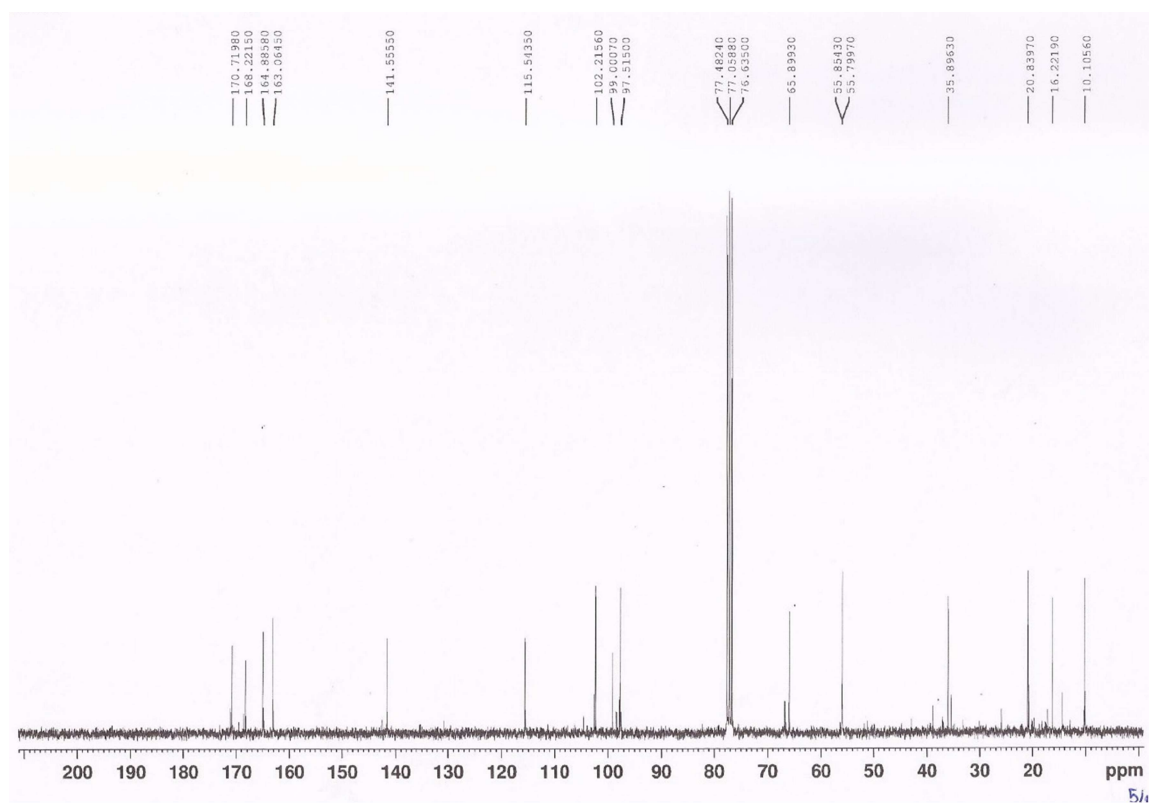

**Figure S9.** COSY spectrum of **2** (CDCl<sub>3</sub>, 300 MHz).

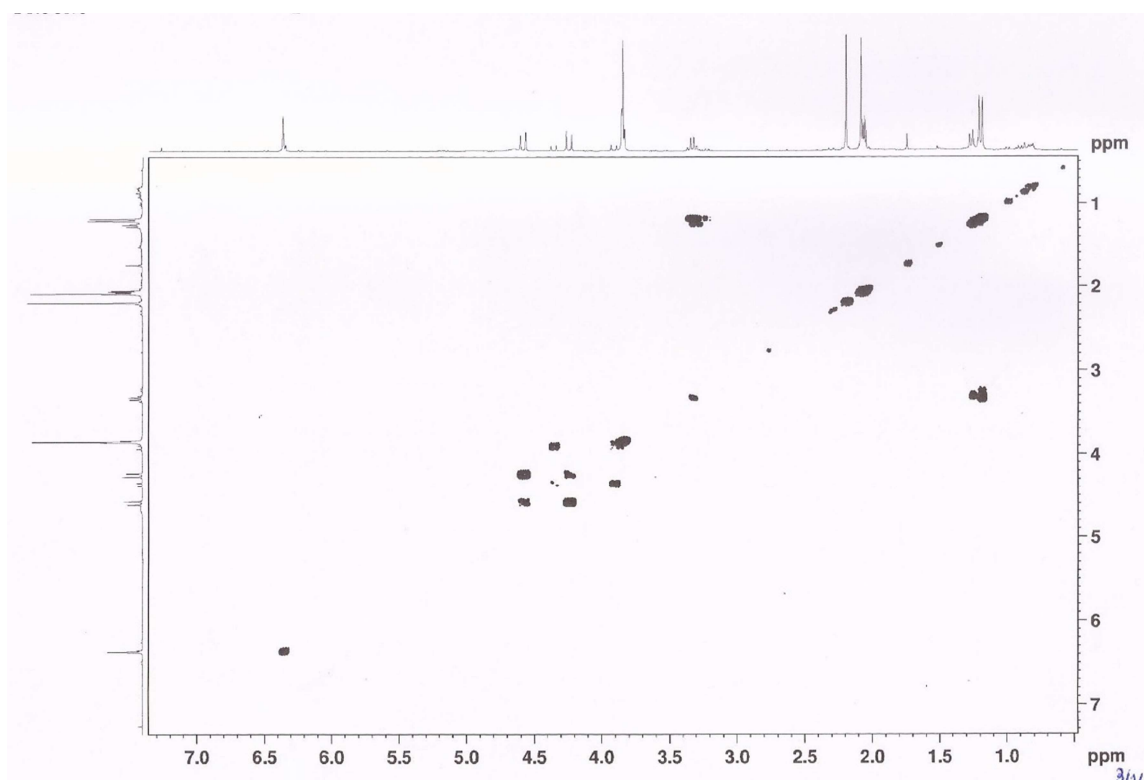

**Figure S10.** HSQC spectrum of **2** (CDCl<sub>3</sub>, 300 MHz).

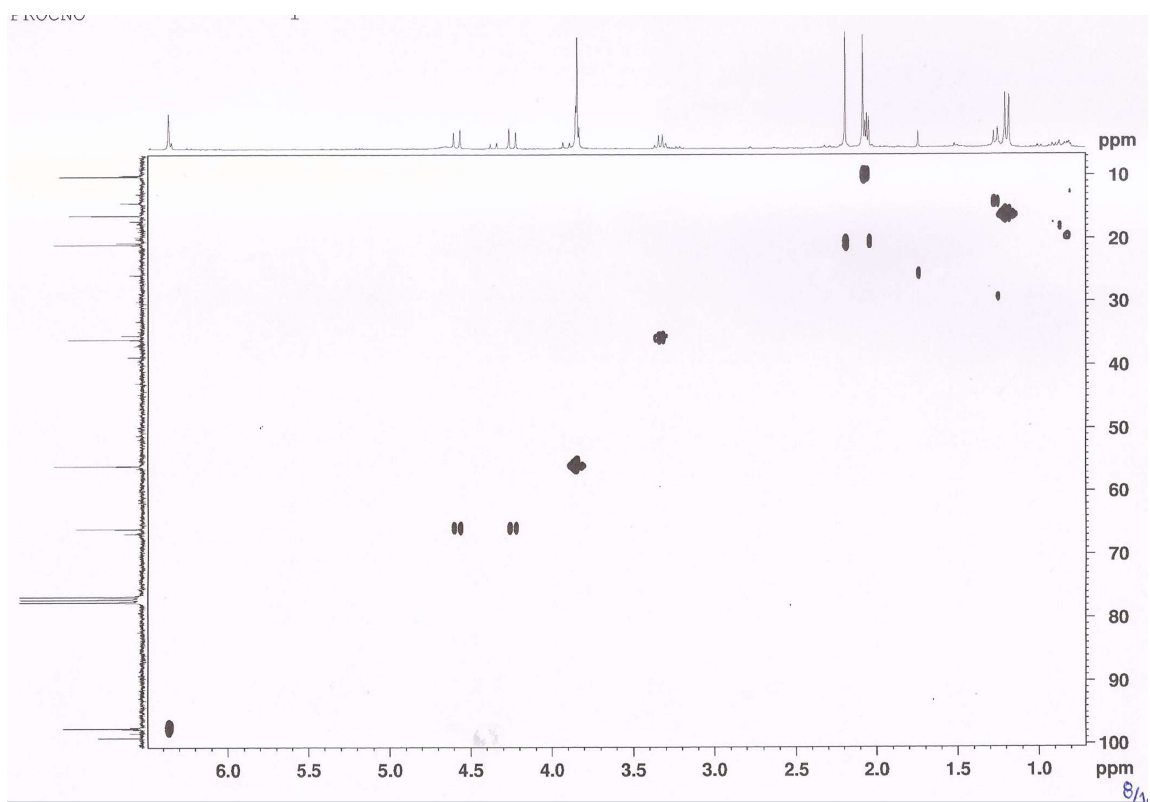

**Figure S11.** HMBC spectrum of **2** (CDCl<sub>3</sub>, 300 MHz).

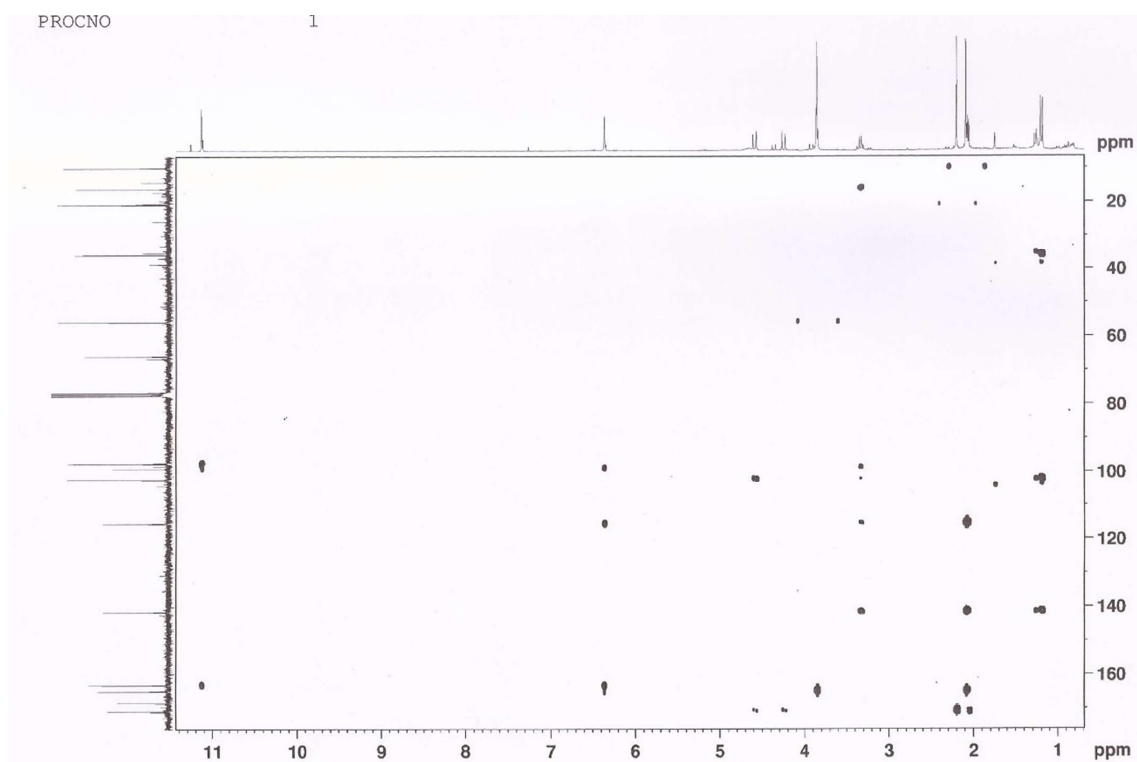

**Figure S12.** ROESY spectrum of **2** (CDCl<sub>3</sub>, 300 MHz).

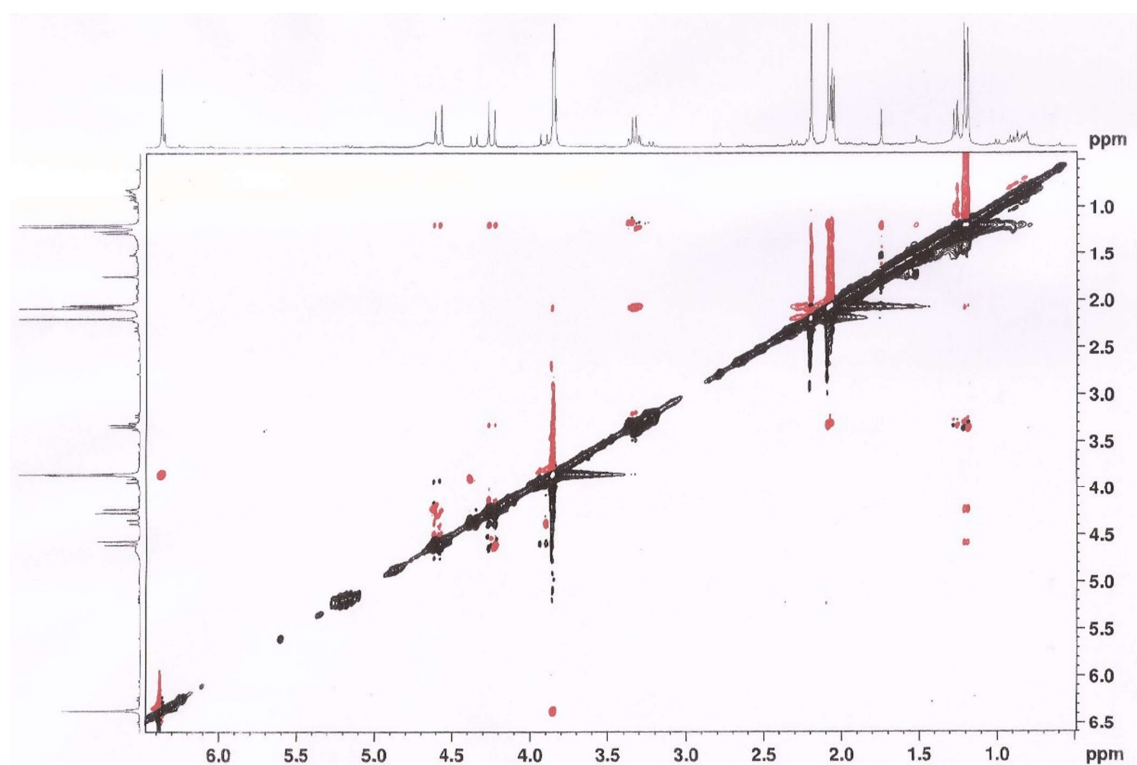

**Figure S13. (+)-HRESIMS spectrum of 2.**

**Elemental Composition Report [MH]<sup>+</sup>**

Single Mass Analysis

Tolerance = 5.0 PPM / DBE: min = -1.5, max = 100.0

Element prediction: Off

Number of isotope peaks used for i-FIT = 3

Monoisotopic Mass, Even Electron Ions

20 formula(e) evaluated with 1 results within limits (up to 100 closest results for each mass)

Elements Used:

C: 15-15 H: 0-150 O: 0-30

Minimum:

-1.5

Maximum:

5.0 5.0 100.0

| Mass     | Calc. Mass | mDa | PPM | DBE | i-FIT | Norm | Conf(%) | Formula    |
|----------|------------|-----|-----|-----|-------|------|---------|------------|
| 311.1133 | 311.1131   | 0.2 | 0.6 | 6.5 | 592.6 | n/a  | n/a     | C15 H19 O7 |

**Elemental Composition Report [MNa]<sup>+</sup>**

Single Mass Analysis

Tolerance = 5.0 PPM / DBE: min = -1.5, max = 100.0

Element prediction: Off

Number of isotope peaks used for i-FIT = 3

Monoisotopic Mass, Even Electron Ions

41 formula(e) evaluated with 1 results within limits (up to 100 closest results for each mass)

Elements Used:

C: 15-15 H: 0-150 O: 0-30 Na: 0-1

Minimum:

-1.5

Maximum:

5.0 5.0 100.0

| Mass     | Calc. Mass | mDa  | PPM  | DBE | i-FIT | Norm | Conf(%) | Formula       |
|----------|------------|------|------|-----|-------|------|---------|---------------|
| 333.0948 | 333.0950   | -0.2 | -0.6 | 6.5 | 602.1 | n/a  | n/a     | C15 H18 O7 Na |

AKHSR 62-79  
ANAKE-G2-228 235 (1.936)

1: TOF MS ES+  
1.25e+007

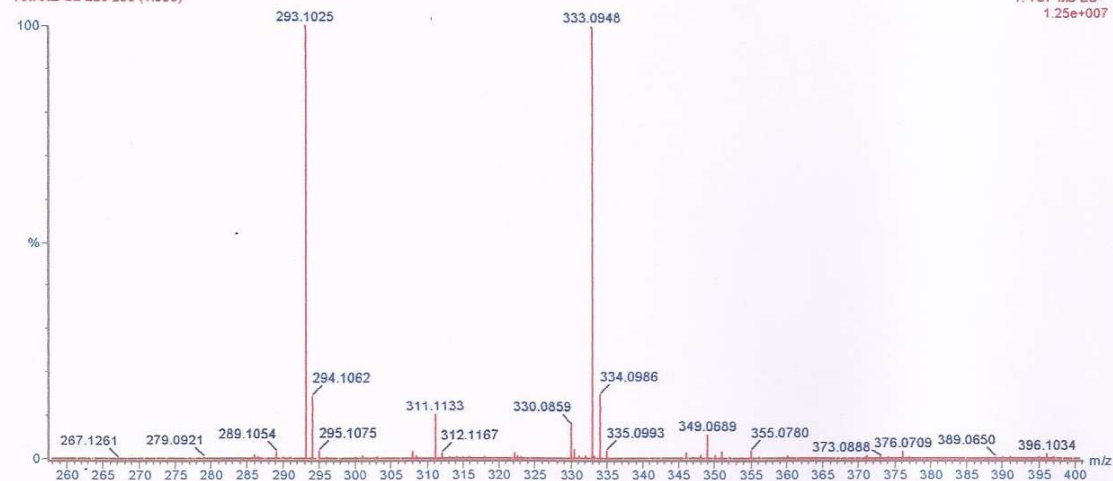

**Figure S14.**  $^1\text{H}$  NMR spectrum of **3** ( $\text{CDCl}_3$ , 300 MHz).

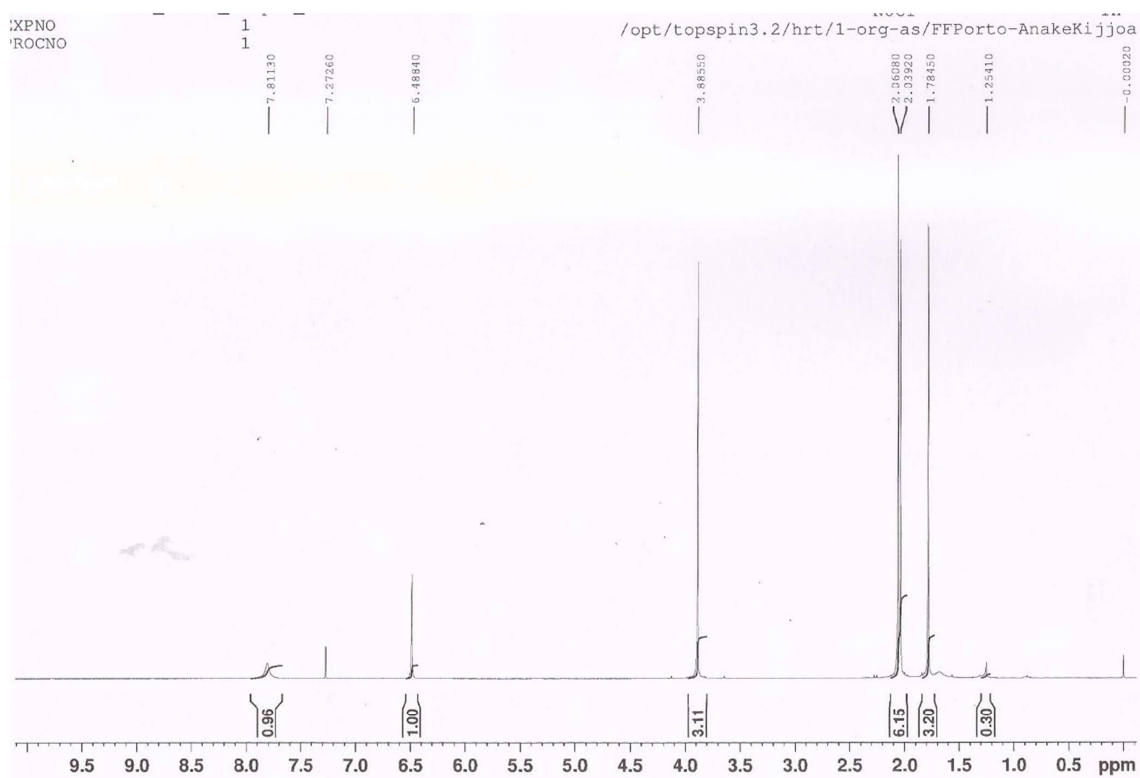

**Figure S15.**  $^{13}\text{C}$  NMR spectrum of **3** ( $\text{CDCl}_3$ , 75 MHz).

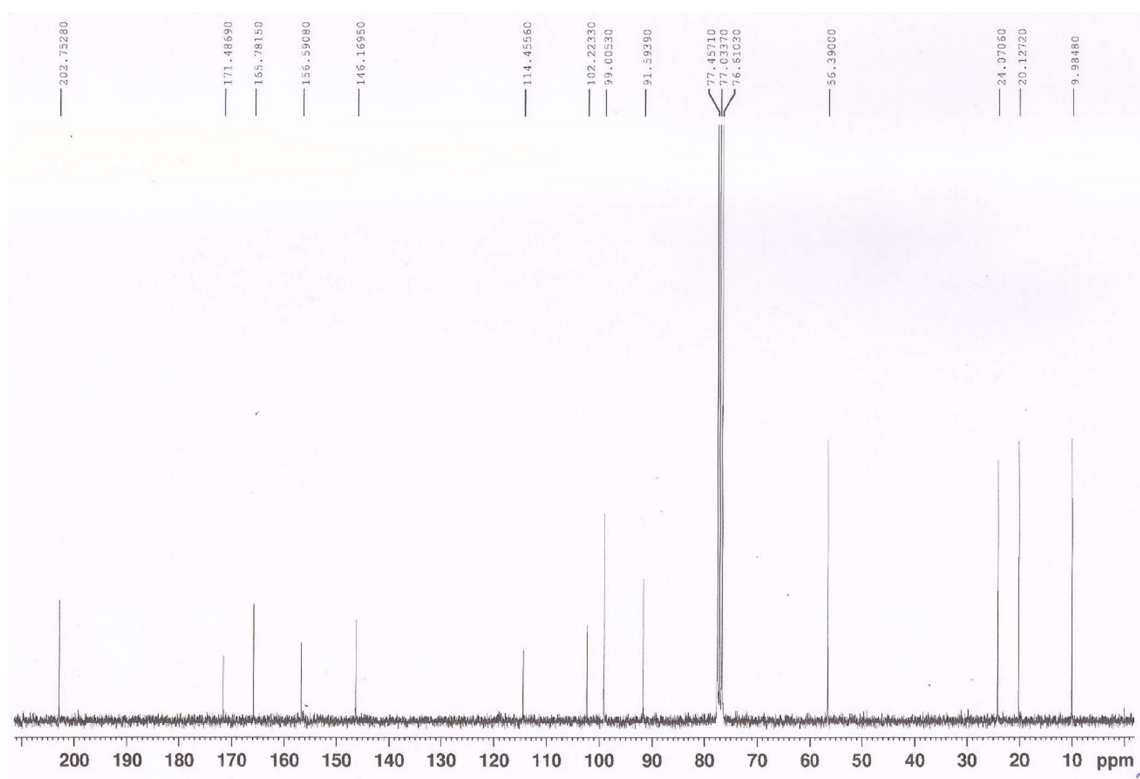

**Figure S16.** COSY spectrum of **3** (CDCl<sub>3</sub>, 300 MHz).

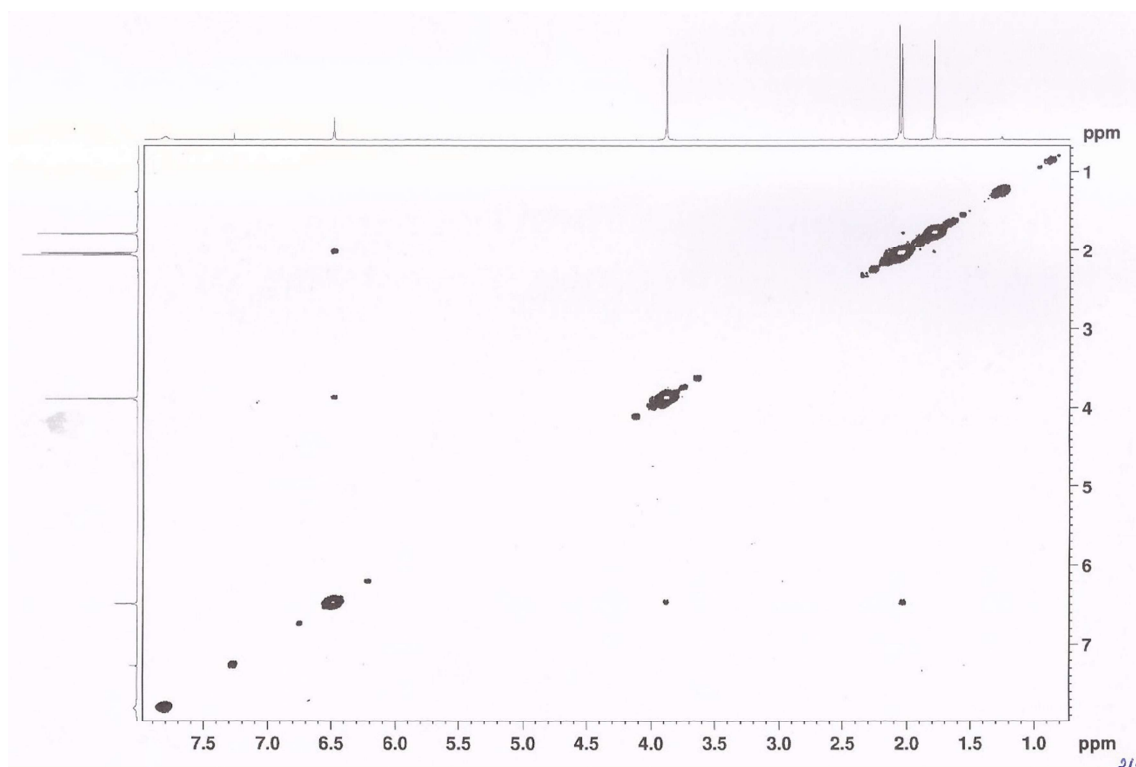

**Figure S17.** HSQC spectrum of **3** (CDCl<sub>3</sub>, 300 MHz).

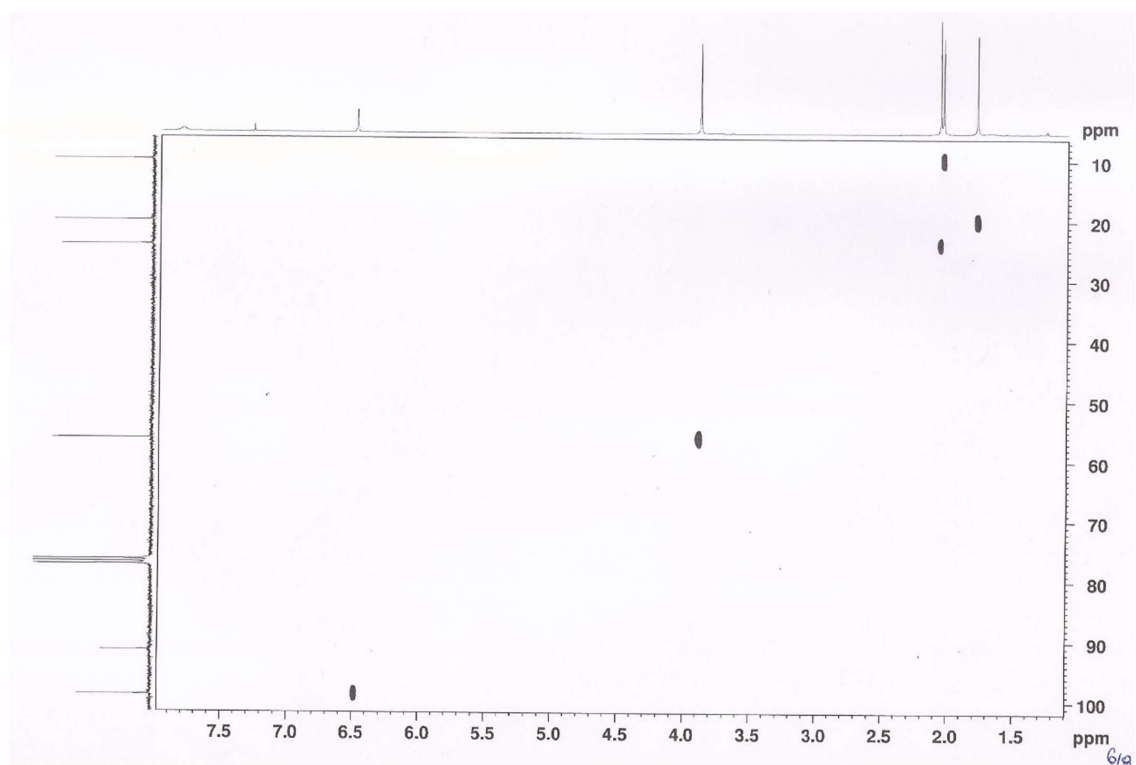

**Figure S18.** HMBC spectrum of **3** (CDCl<sub>3</sub>, 300 MHz).

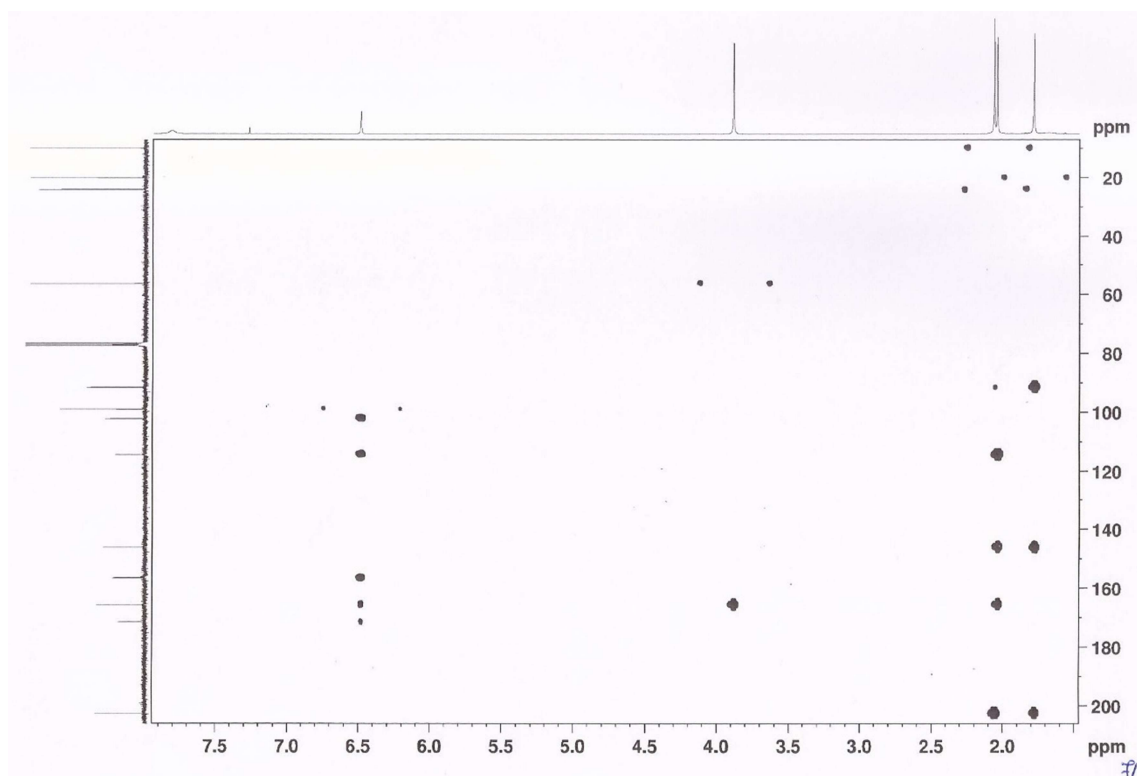

**Figure S19.** <sup>1</sup>H NMR spectrum of **4a** (CDCl<sub>3</sub>, 300 MHz).

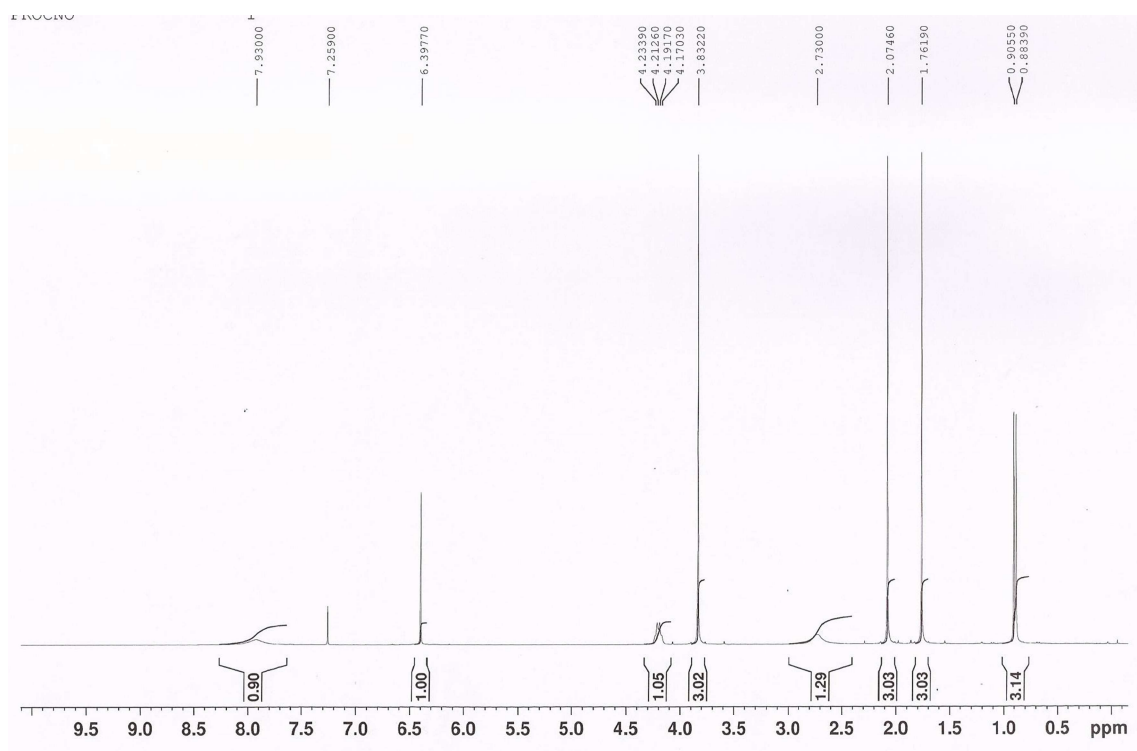



**Figure S20.**  $^{13}\text{C}$  NMR spectrum of **4a** ( $\text{CDCl}_3$ , 75 MHz).

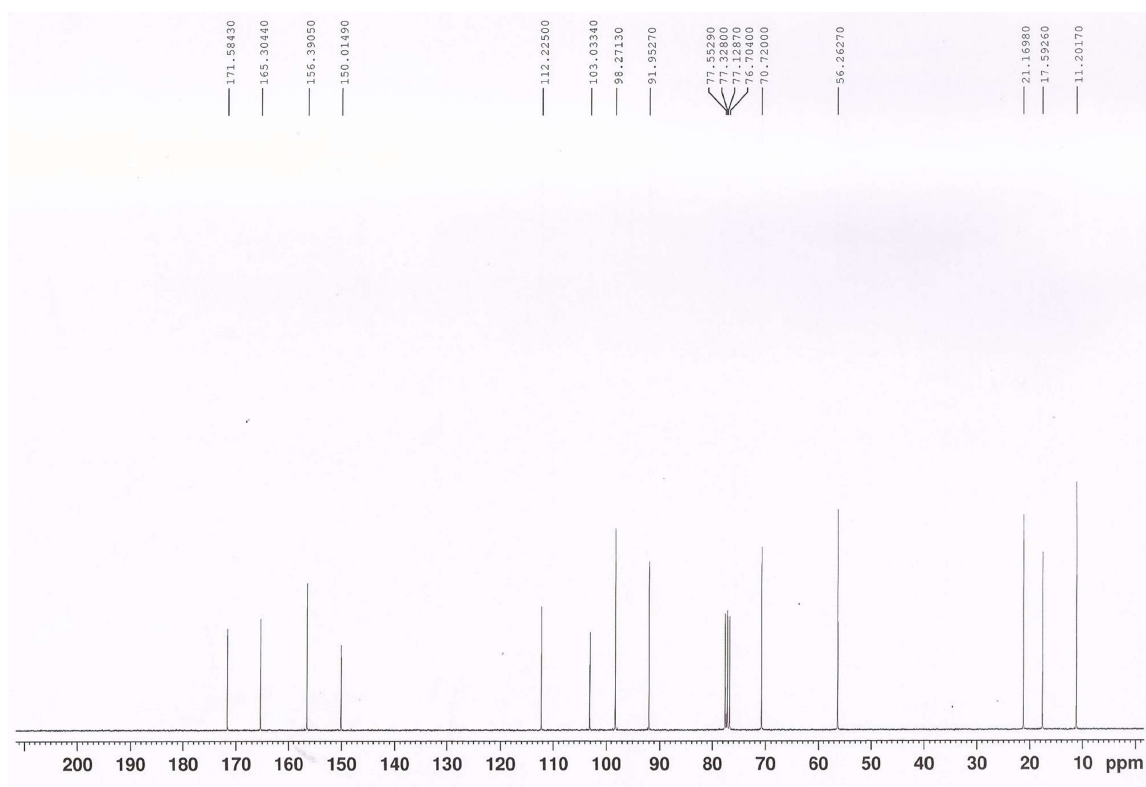

**Figure S21.** COSY spectrum of **4a** ( $\text{CDCl}_3$ , 300 MHz).

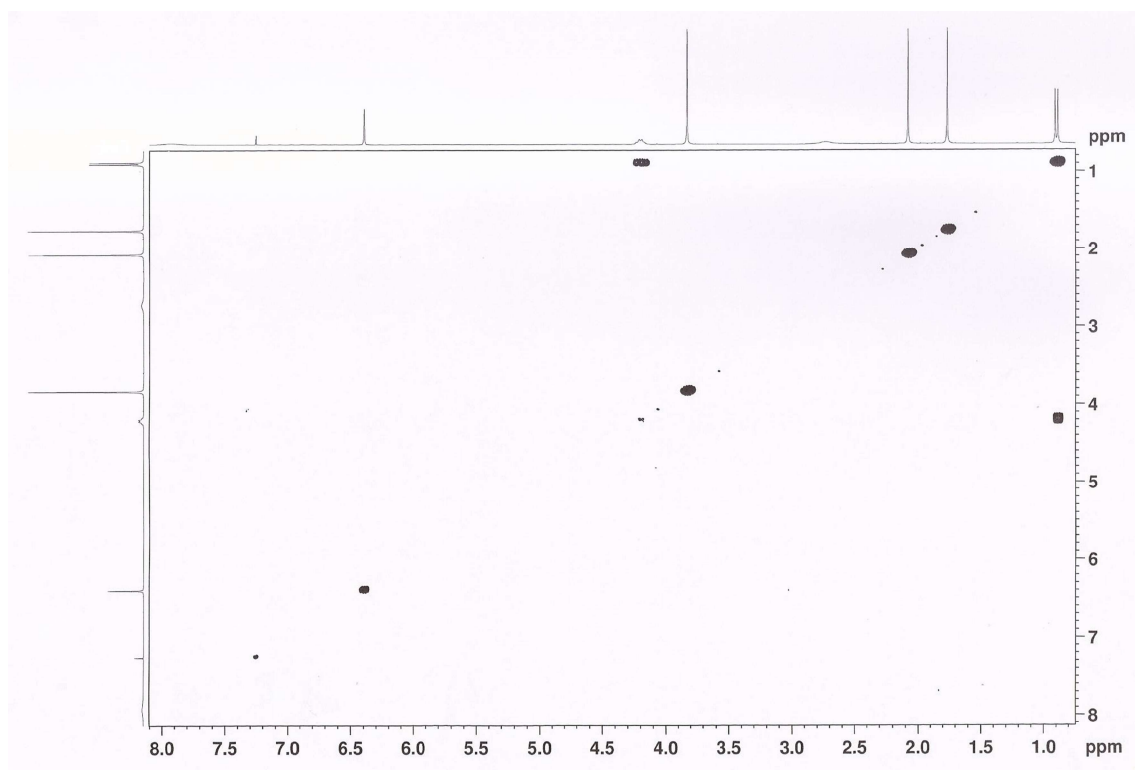

**Figure S22.** HSQC spectrum of **4a** (CDCl<sub>3</sub>, 300 MHz).

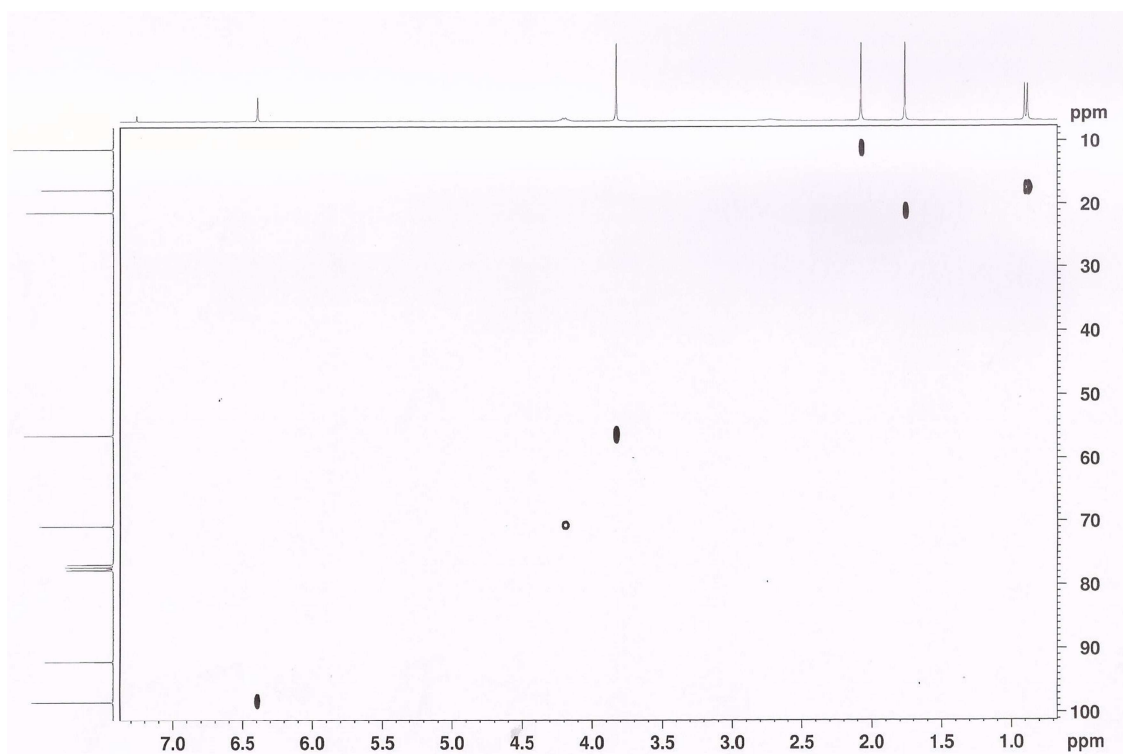

**Figure S23.** HMBC spectrum of **4a** (CDCl<sub>3</sub>, 300 MHz).

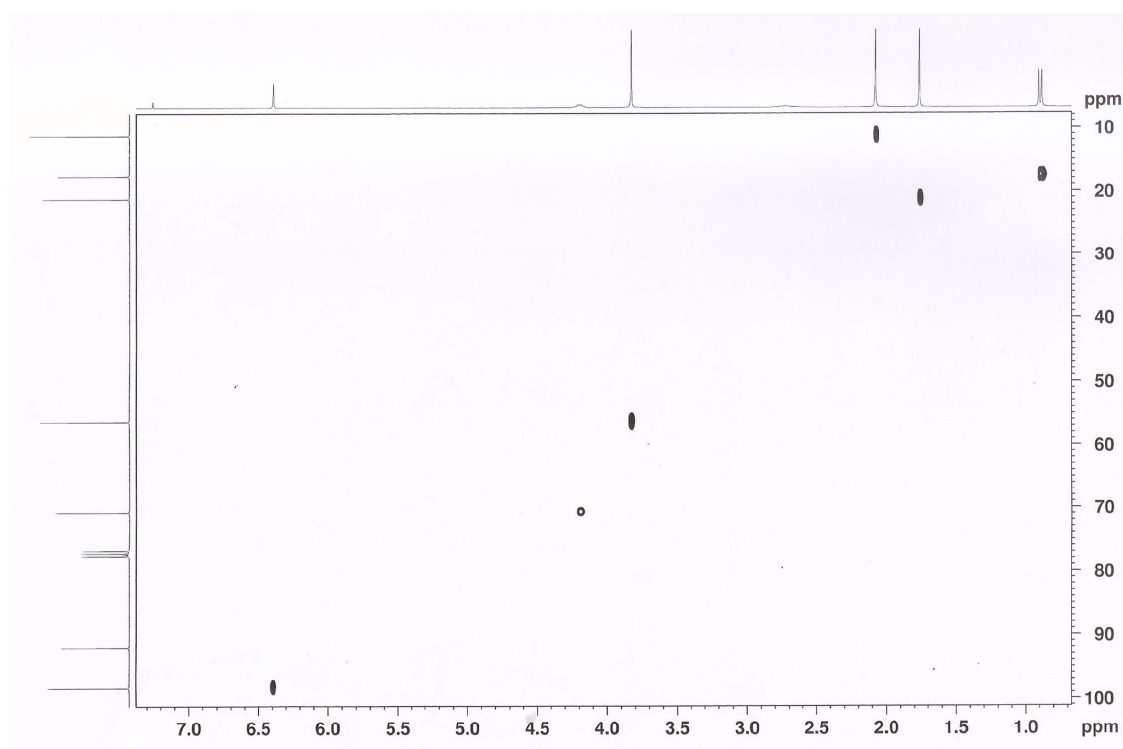

**Figure S24.**  $^1\text{H}$  NMR spectrum of **4b** ( $\text{CDCl}_3$ , 300 MHz).

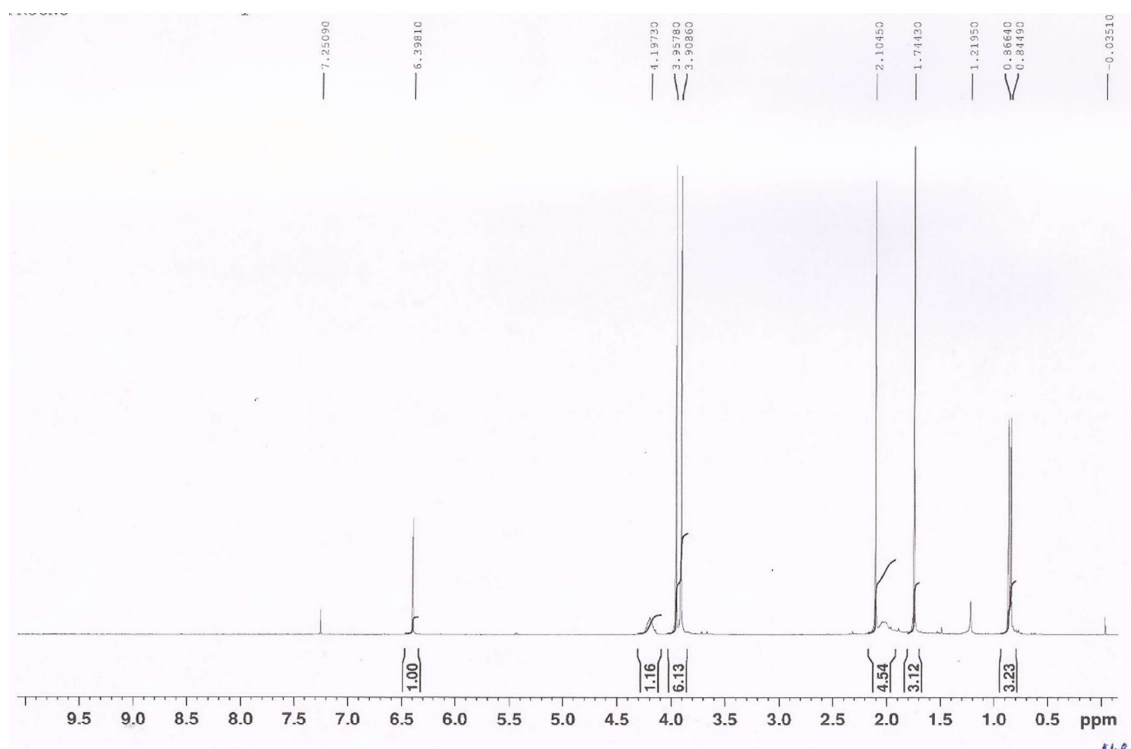

**Figure S25.**  $^{13}\text{C}$  NMR spectrum of **4b** ( $\text{CDCl}_3$ , 75 MHz).

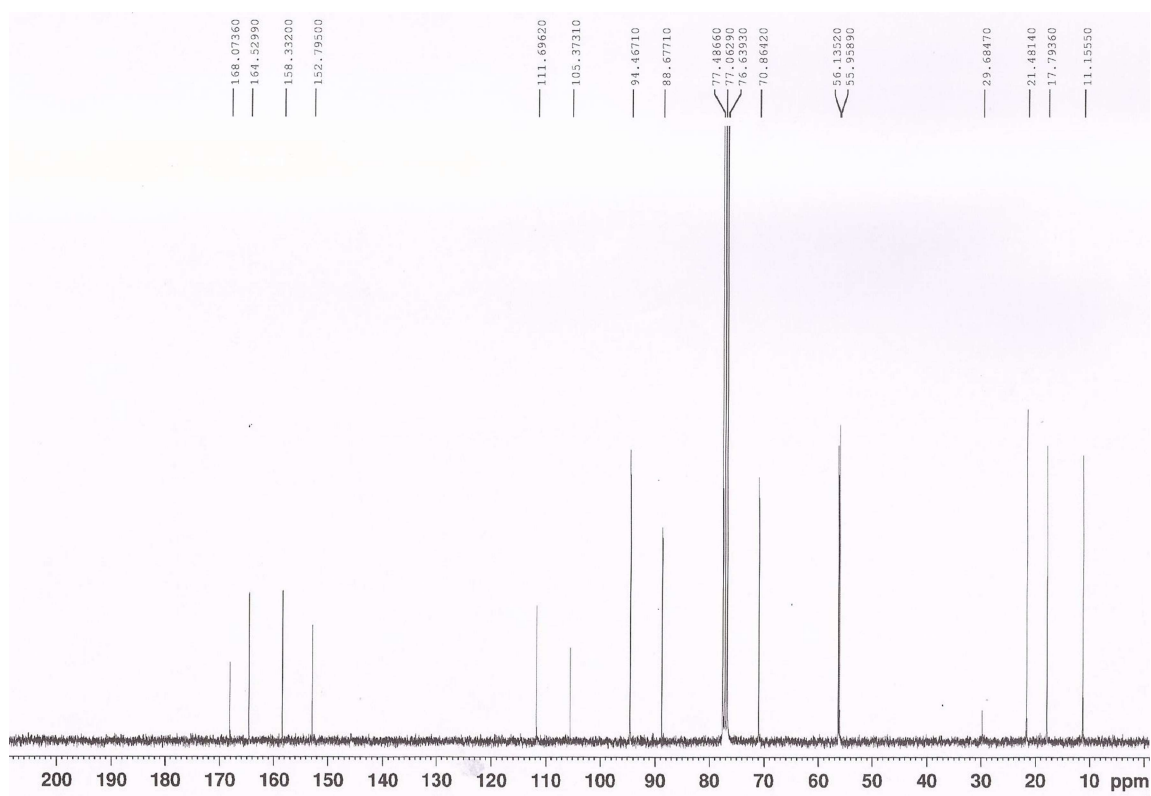

**Figure S26.** COSY spectrum of **4b** (CDCl<sub>3</sub>, 300 MHz).

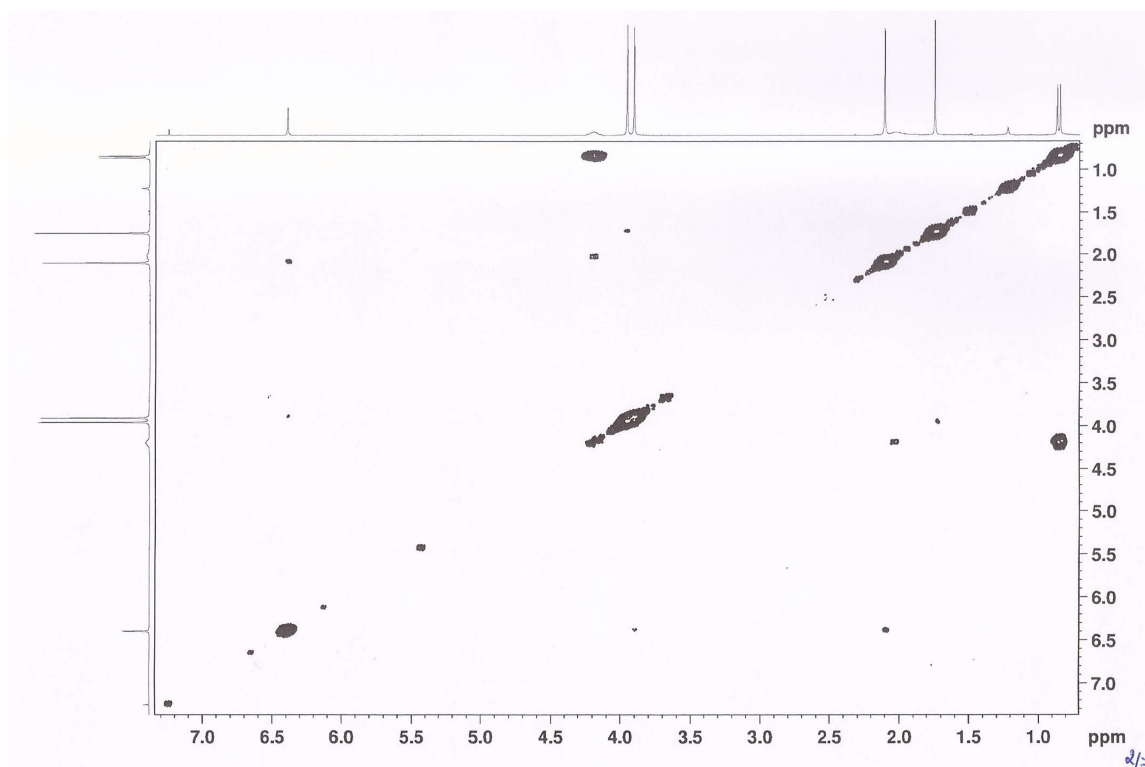

**Figure S27.** HSQC spectrum of **4b** (CDCl<sub>3</sub>, 300 MHz).

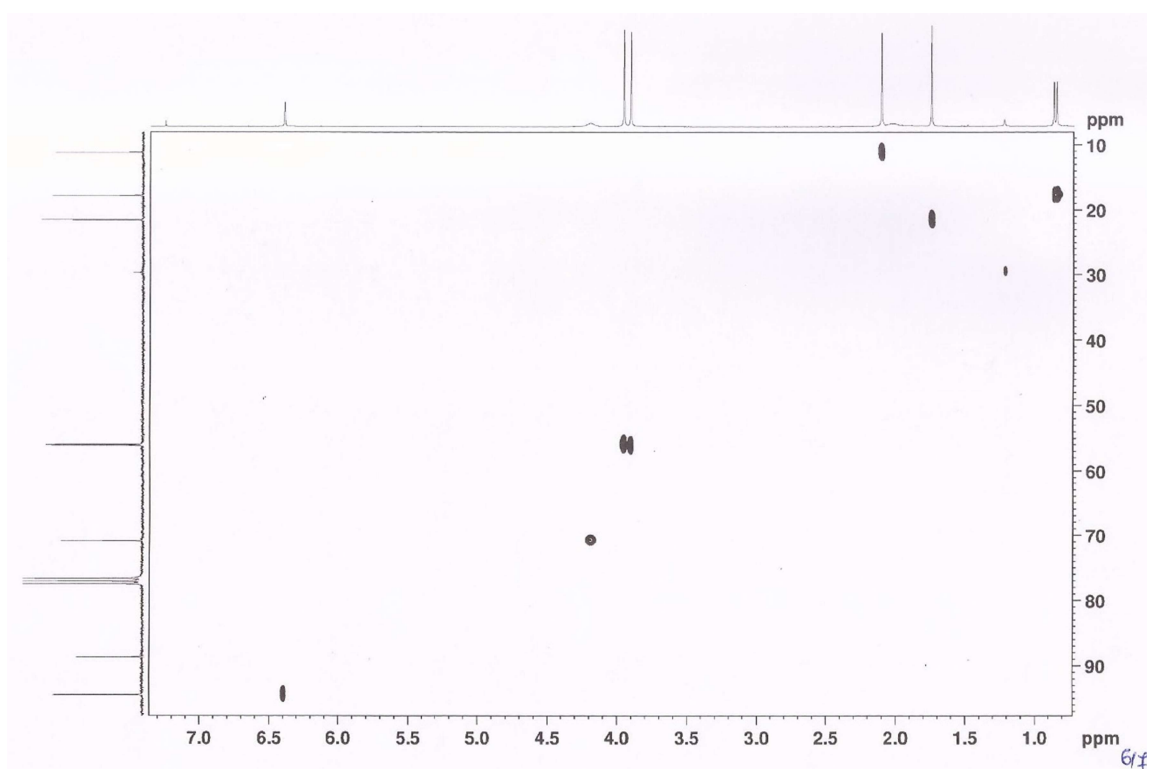

**Figure S28.** HMBC spectrum of **4b** (CDCl<sub>3</sub>, 300 MHz).

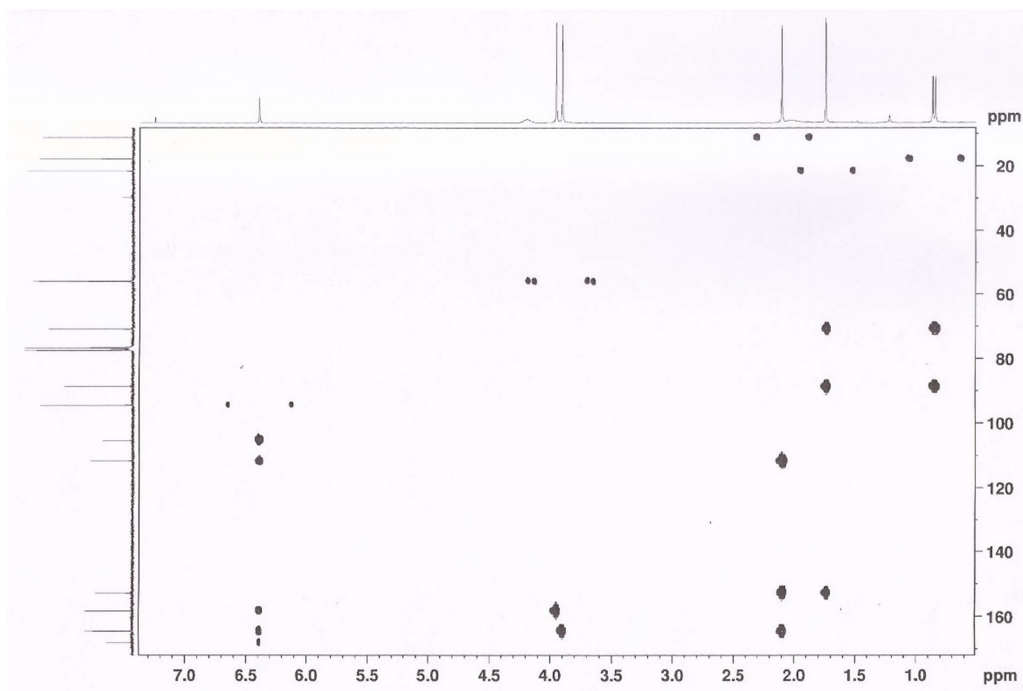

**Figure S29.** (+)-HRESIMS of **4b**

**Elemental Composition Report [MH]<sup>+</sup>**

Single Mass Analysis

Tolerance = 5.0 PPM / DBE: min = -1.5, max = 100.0

Element prediction: Off

Number of isotope peaks used for i-FIT = 3

Monoisotopic Mass, Even Electron Ions

17 formula(e) evaluated with 1 results within limits (up to 100 closest results for each mass)

Elements Used:

C: 14-14 H: 0-150 O: 0-30

Minimum:

| Mass     | Calc. Mass | mDa | PPM | DBE | i-FIT | Norm | Conf(%) | Formula    |
|----------|------------|-----|-----|-----|-------|------|---------|------------|
| 267.1233 | 267.1232   | 0.1 | 0.4 | 5.5 | 845.2 | n/a  | n/a     | C14 H19 O5 |

**Elemental Composition Report [MNa]<sup>+</sup>**

Single Mass Analysis

Tolerance = 5.0 PPM / DBE: min = -1.5, max = 100.0

Element prediction: Off

Number of isotope peaks used for i-FIT = 3

Monoisotopic Mass, Even Electron Ions

36 formula(e) evaluated with 1 results within limits (up to 100 closest results for each mass)

Elements Used:

C: 14-14 H: 0-150 O: 0-30 Na: 0-1

Minimum:

| Mass     | Calc. Mass | mDa | PPM | DBE | i-FIT | Norm | Conf(%) | Formula       |
|----------|------------|-----|-----|-----|-------|------|---------|---------------|
| 289.1053 | 289.1052   | 0.1 | 0.3 | 5.5 | 662.1 | n/a  | n/a     | C14 H18 O5 Na |

AKHSR 150-166/35-59 Prep 1  
ANAKE-G2-234 191 (1.577)

1: TOF MS ES+  
3.62e+007

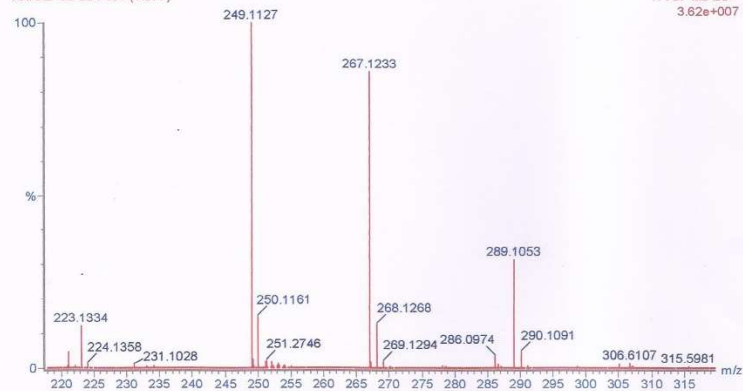

**Figure S30.**  $^1\text{H}$  NMR spectrum of **5** ( $\text{CDCl}_3$ , 300 MHz).

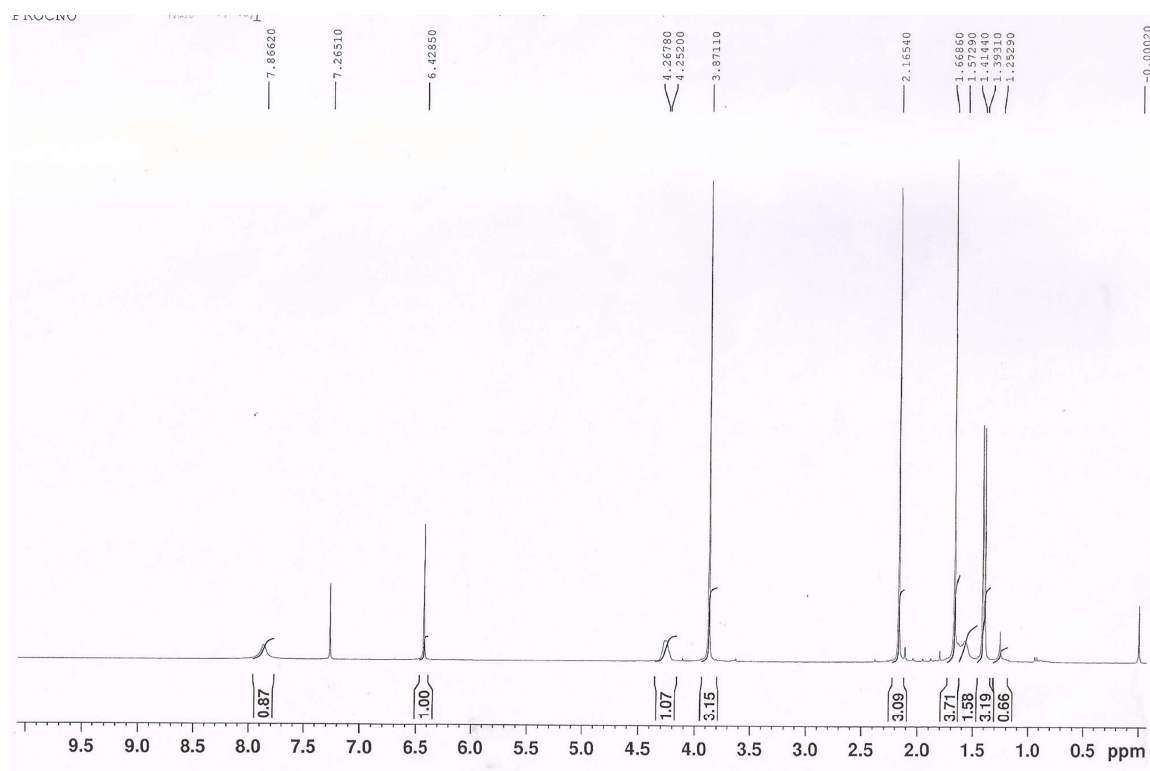

**Figure S31.**  $^{13}\text{C}$  NMR spectrum of **5** ( $\text{CDCl}_3$ , 75 MHz).

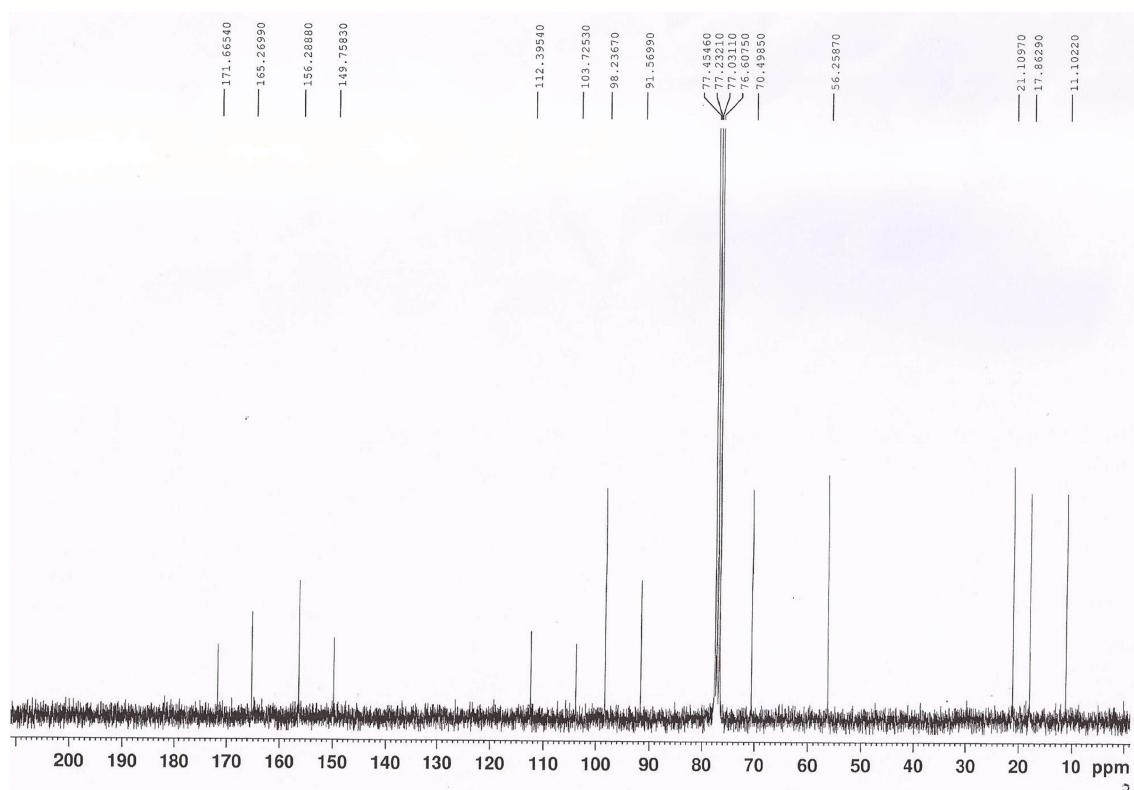

**Figure S32.** COSY spectrum of **5** (CDCl<sub>3</sub>, 300 MHz).

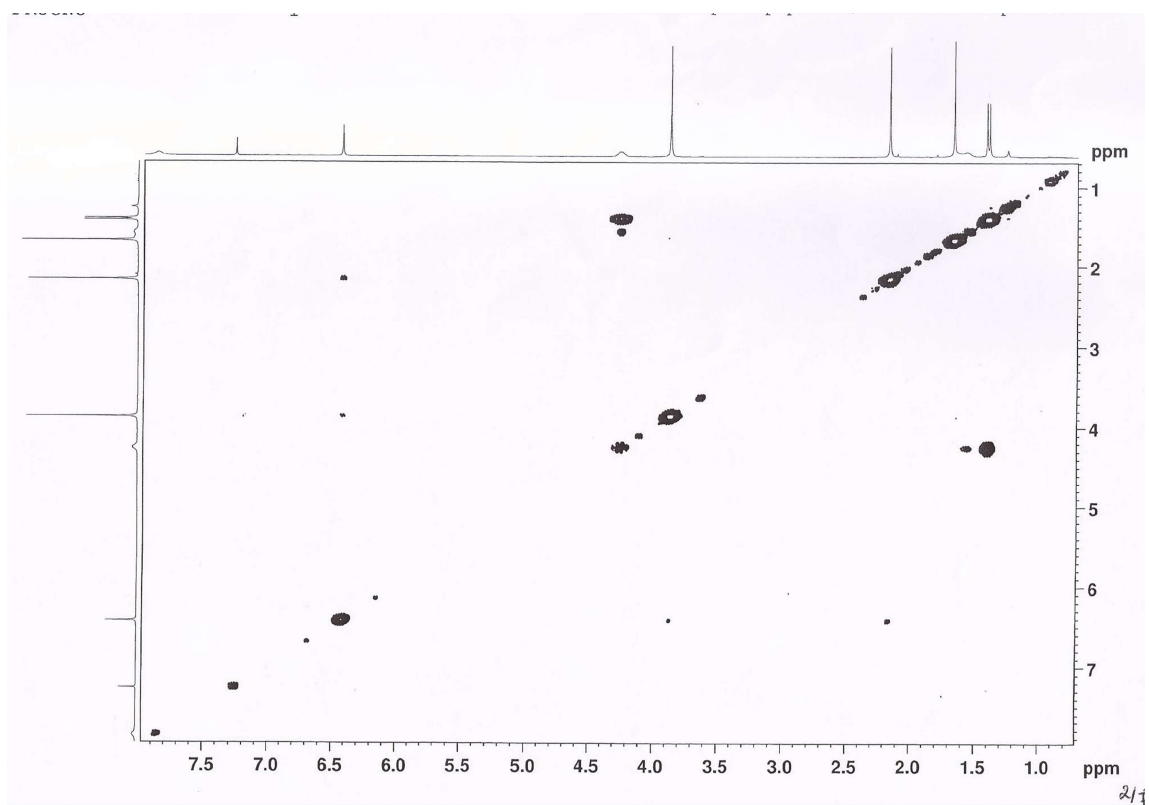

**Figure S33.** HSQC spectrum of **5** (CDCl<sub>3</sub>, 300 MHz).

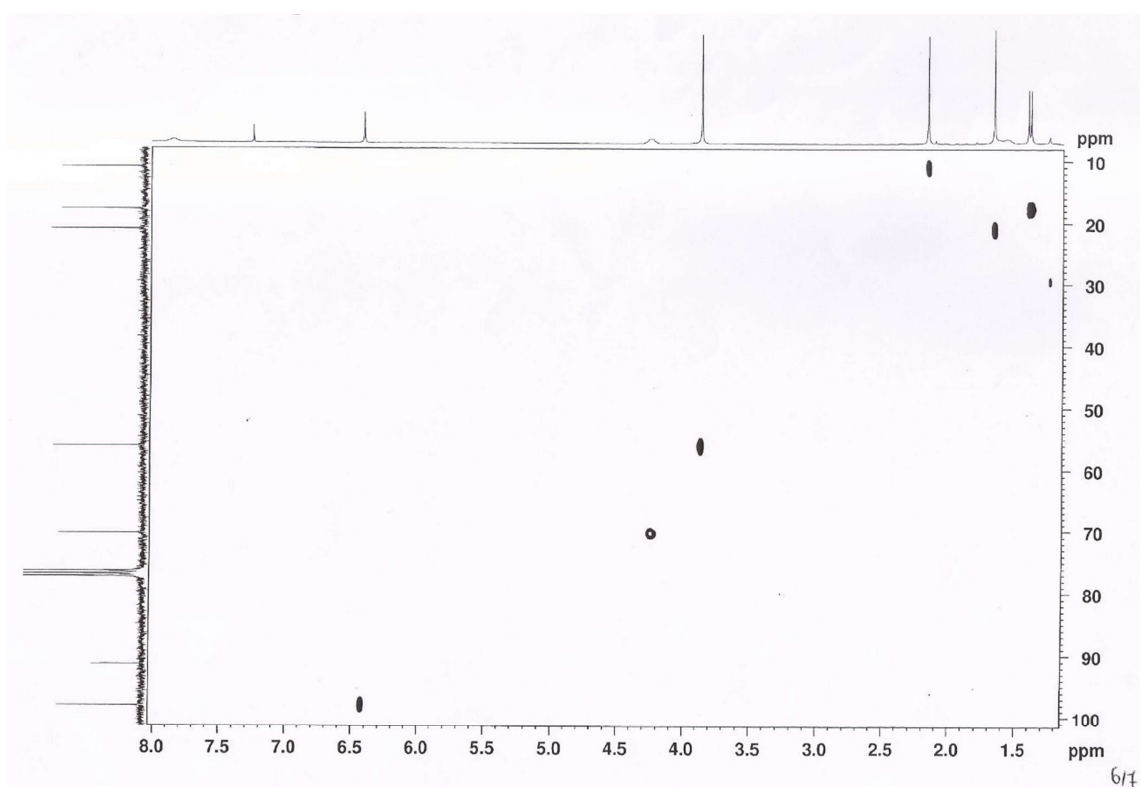



**Figure S34.** HMBC spectrum of **5** (CDCl<sub>3</sub>, 300 MHz).

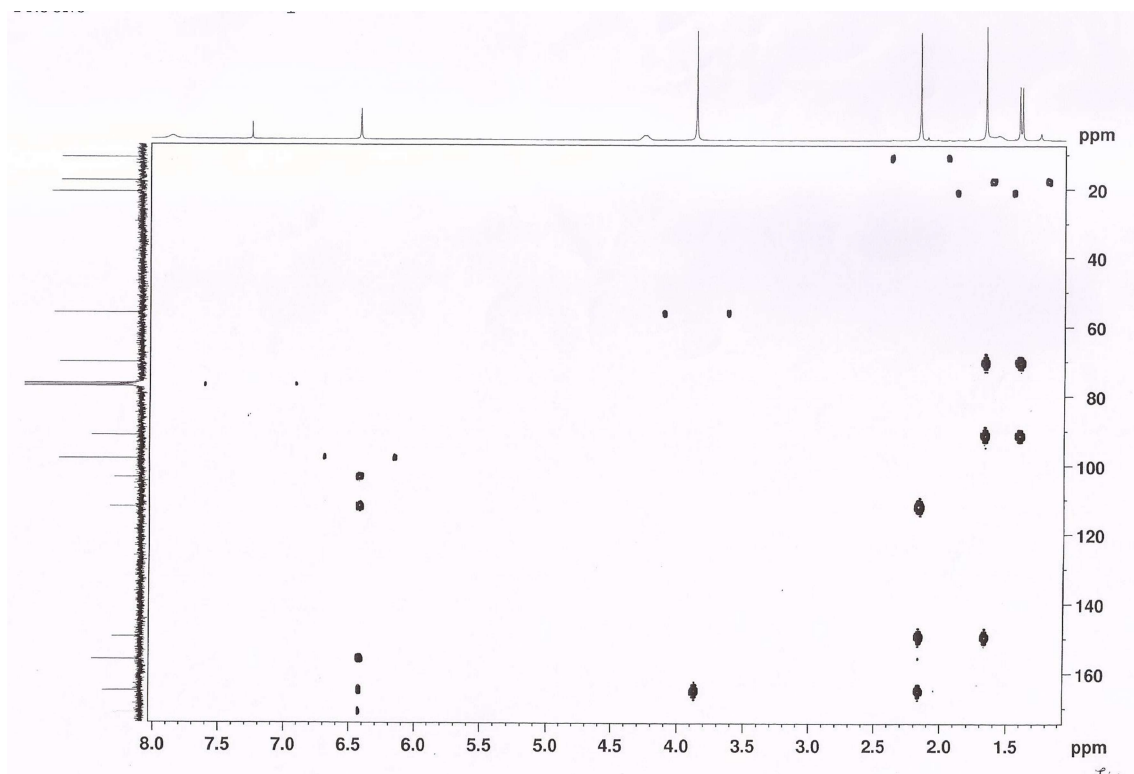

**Figure S35.** (+)-HRESIMS of **5**.

#### Elemental Composition Report [MH]<sup>+</sup>

Single Mass Analysis:

Tolerance = 5.0 PPM / DBE: min = -1.5, max = 100.0

Element prediction: Off

Number of isotope peaks used for i-FIT = 3

Monoisotopic Mass, Even Electron Ions

16 formula(e) evaluated with 1 results within limits (up to 100 closest results for each mass)

Elements Used:

C: 13-13 H: 0-150 O: 0-30

Minimum:

-1.5

Maximum:

5.0

5.0

100.0

Mass

Calc. Mass

mDa

PPM

DBE

i-FIT

Norm

Conf(%)

Formula

253.1077

253.1076

0.1

0.4

5.5

832.1

n/a

n/a

C<sub>13</sub> H<sub>17</sub> O<sub>5</sub>

AKHSR 117-149

ANAKE-G2-233 193 (1.599)

1: TOF MS ES+  
4.14e+007

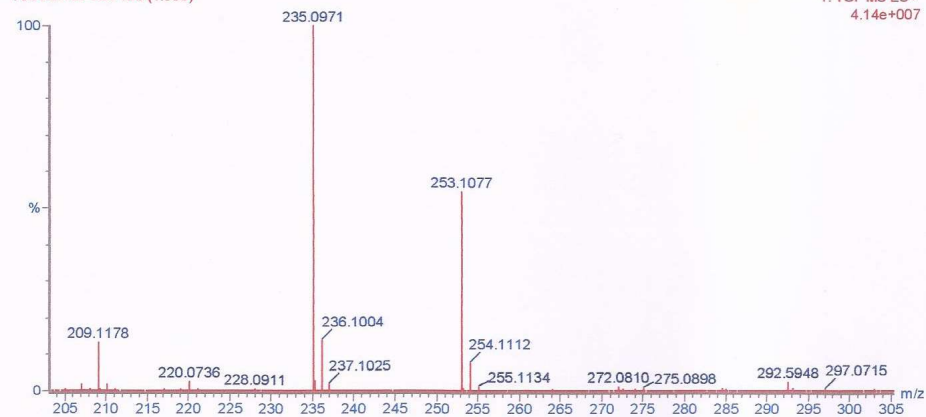

**Figure S36.**  $^1\text{H}$  NMR spectrum of **6** ( $\text{DMSO-d}_6$ , 300 MHz).

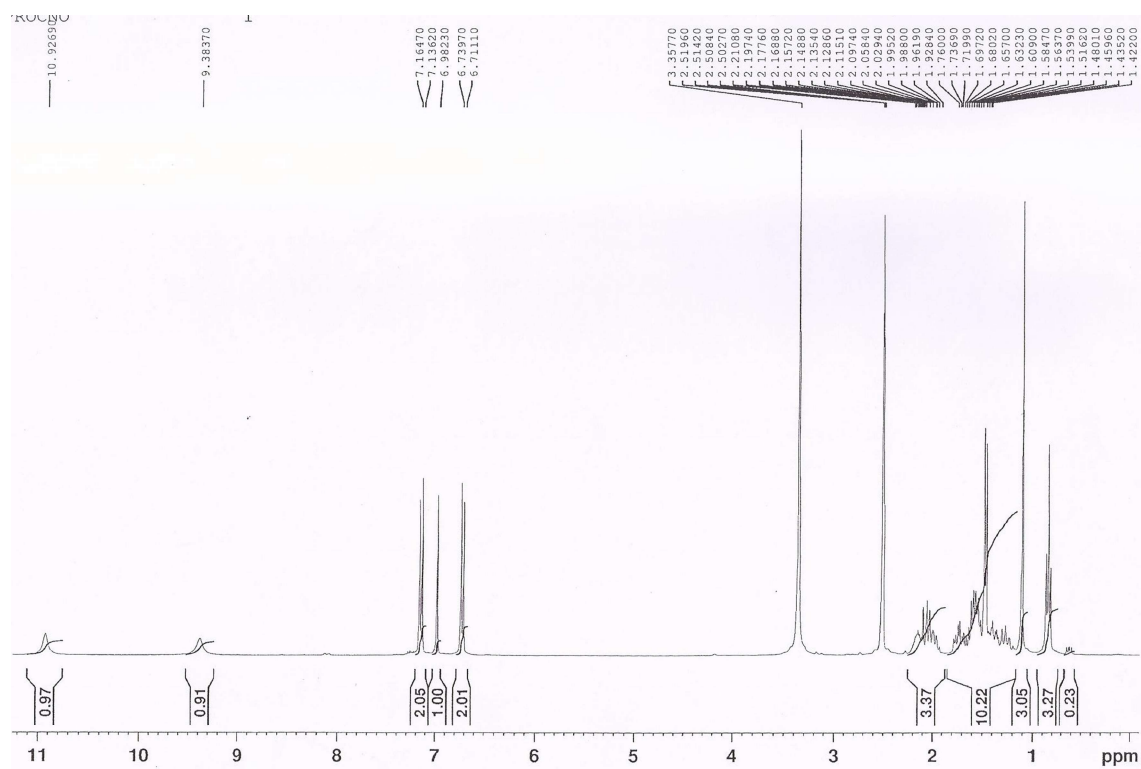

**Figure S37.**  $^{13}\text{C}$  NMR spectrum of **6** ( $\text{DMSO-d}_6$ , 75 MHz).

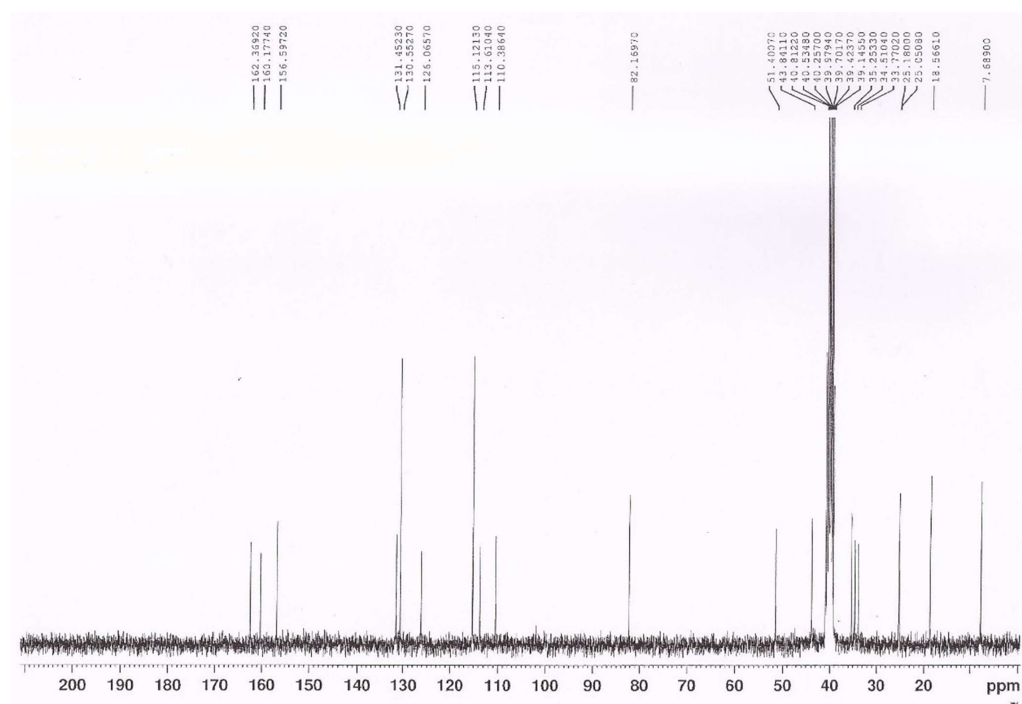

**Figure S38.** COSY spectrum of **6** (DMSO<sub>d6</sub>, 300 MHz).

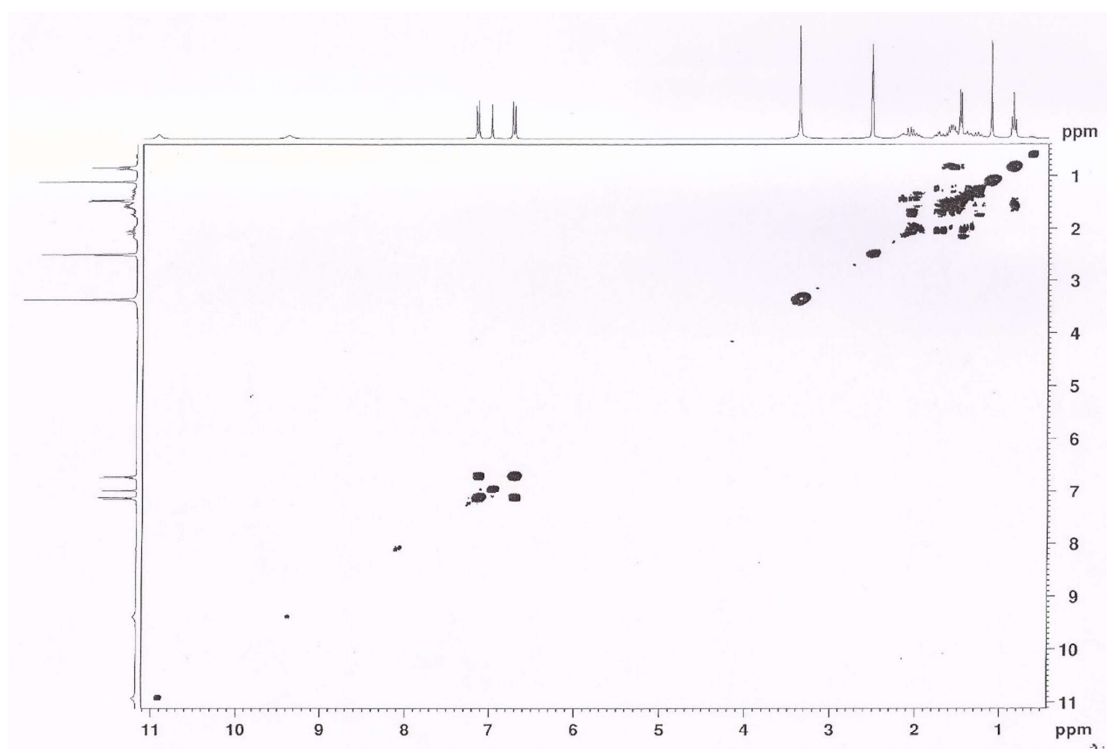

**Figure S39.** HSQC spectrum of **6** (DMSO<sub>d6</sub>, 300 MHz).

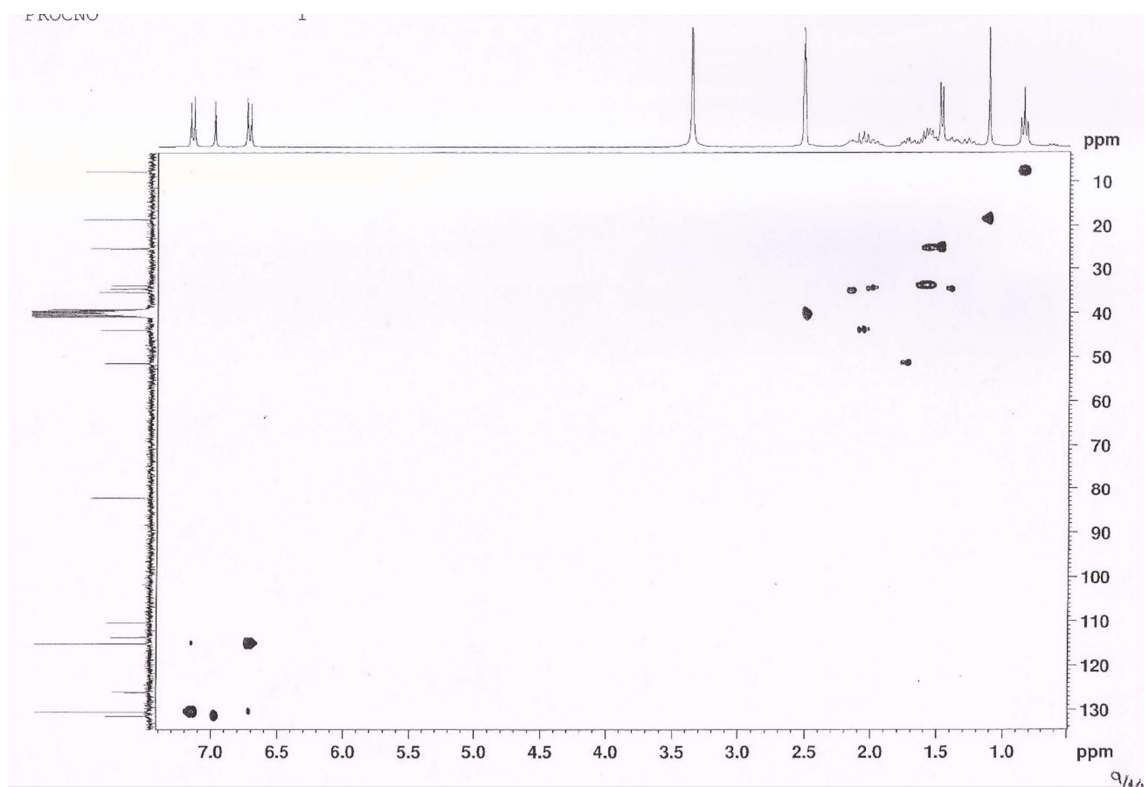

**Figure S40.** HMBC spectrum of **6** (DMSO<sub>d</sub><sub>6</sub>, 300 MHz).

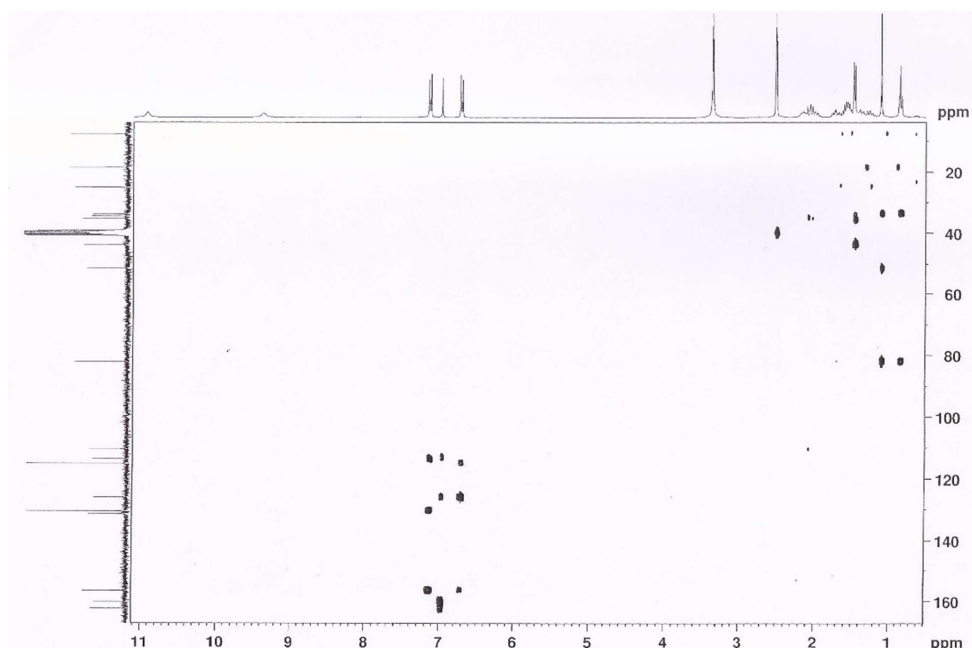

**Figure S41.** (+)-HRESIMS of **6**.

Match for C<sub>21</sub>H<sub>25</sub>NO<sub>3</sub> (No match for C<sub>21</sub>H<sub>26</sub>O<sub>3</sub>)

**Elemental Composition Report [MH]<sup>+</sup>**

Single Mass Analysis

Tolerance = 5.0 PPM / DBE: min = -1.5, max = 100.0

Element prediction: Off

Number of isotope peaks used for i-FIT = 3

Monoisotopic Mass, Even Electron Ions

372 formula(e) evaluated with 1 results within limits (up to 100 closest results for each mass)

Elements Used:

C: 18-25 H: 0-150 N: 0-30 O: 0-30

Minimum: -1.5

Maximum: 5.0 5.0 100.0

| Mass     | Calc. Mass | mDa | PPM | DBE | i-FIT | Norm | Conf(%) | Formula                                          |
|----------|------------|-----|-----|-----|-------|------|---------|--------------------------------------------------|
| 340.1913 | 340.1913   | 0.0 | 0.0 | 9.5 | 991.8 | n/a  | n/a     | C <sub>21</sub> H <sub>26</sub> N O <sub>3</sub> |

**Elemental Composition Report [MNa]<sup>+</sup>**

Single Mass Analysis

Tolerance = 5.0 PPM / DBE: min = -1.5, max = 100.0

Element prediction: Off

Number of isotope peaks used for i-FIT = 3

Monoisotopic Mass, Even Electron Ions

592 formula(e) evaluated with 1 results within limits (up to 100 closest results for each mass)

Elements Used:

C: 21-21 H: 0-150 N: 0-30 O: 0-30 Na: 0-1

Minimum: -1.5

Maximum: 5.0 5.0 100.0

| Mass     | Calc. Mass | mDa | PPM | DBE | i-FIT | Norm | Conf(%) | Formula                                             |
|----------|------------|-----|-----|-----|-------|------|---------|-----------------------------------------------------|
| 362.1734 | 362.1732   | 0.2 | 0.6 | 9.5 | 901.3 | n/a  | n/a     | C <sub>21</sub> H <sub>25</sub> N O <sub>3</sub> Na |

AKHSR 326-349/33-25  
ANAKE-G2-235 250 (2.108)

1: TOF MS ES+  
3.80e+007

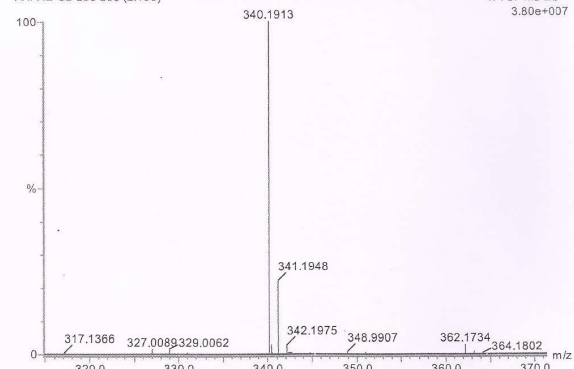

**Figure S42.**  $^1\text{H}$  NMR spectrum of **7** ( $\text{CDCl}_3$ , 300 MHz).

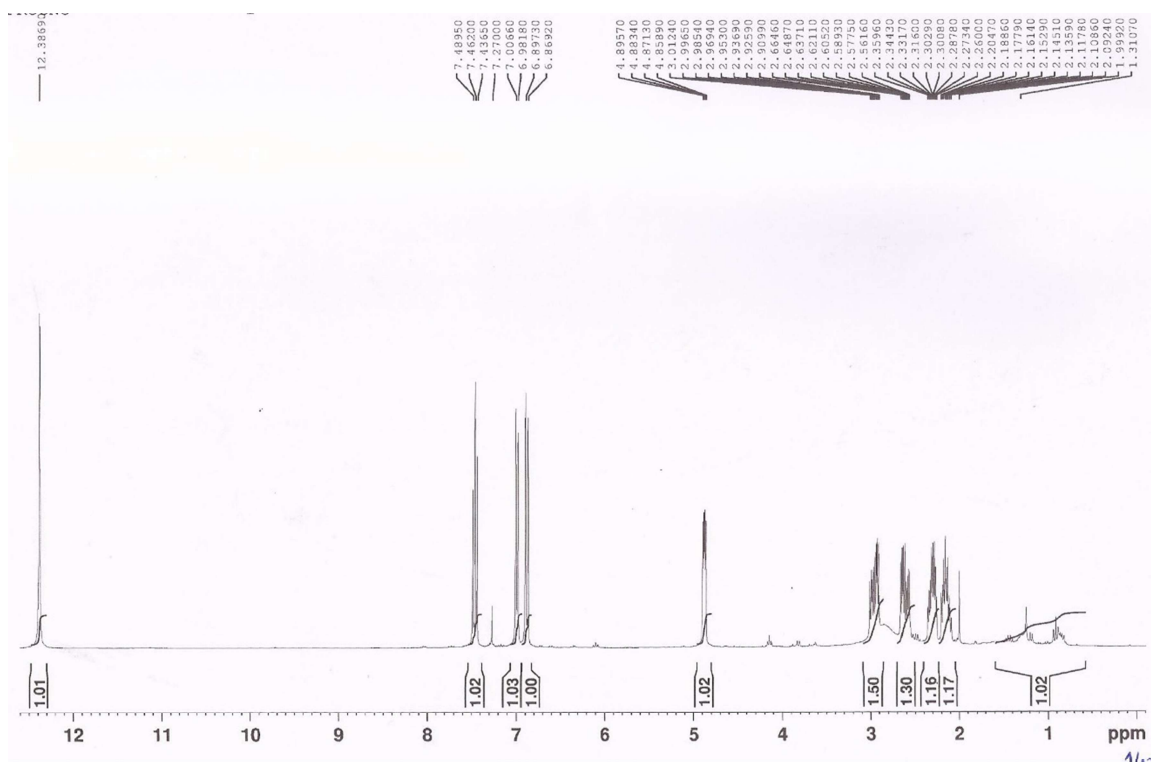

**Figure S43.**  $^{13}\text{C}$  NMR spectrum of **7** ( $\text{CDCl}_3$ , 75 MHz).

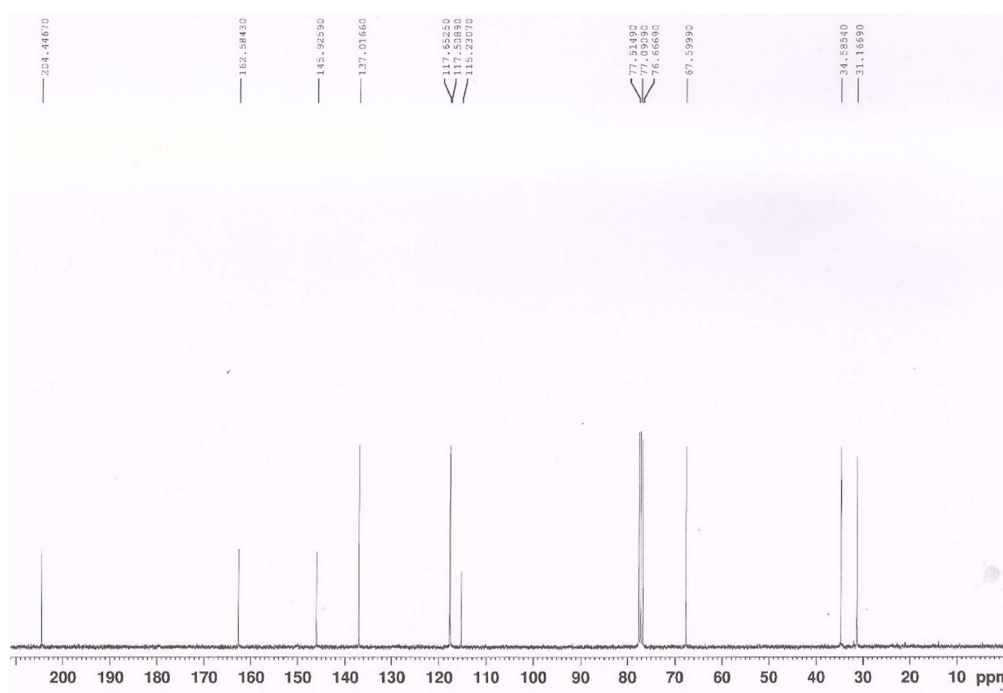

**Figure S44.** COSY spectrum of **7** (CDCl<sub>3</sub>, 300 MHz).

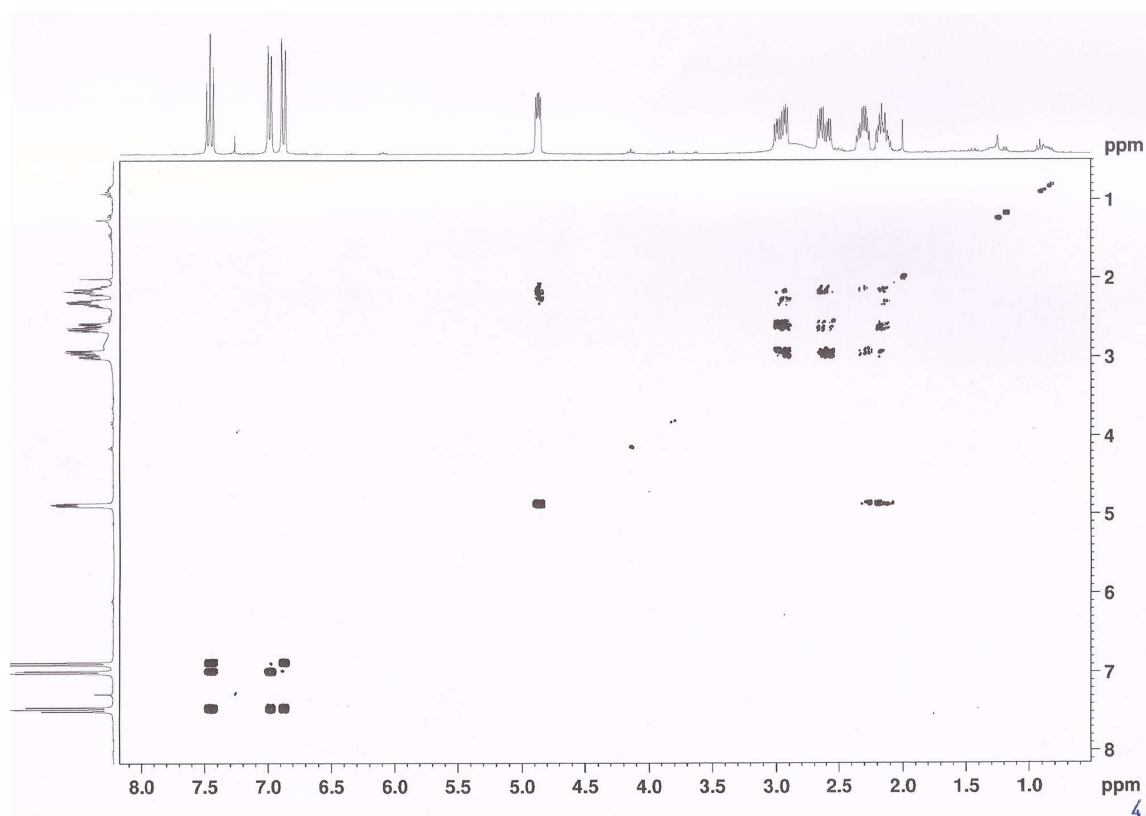

**Figure S45.** HSQC spectrum of **7** (CDCl<sub>3</sub>, 300 MHz).

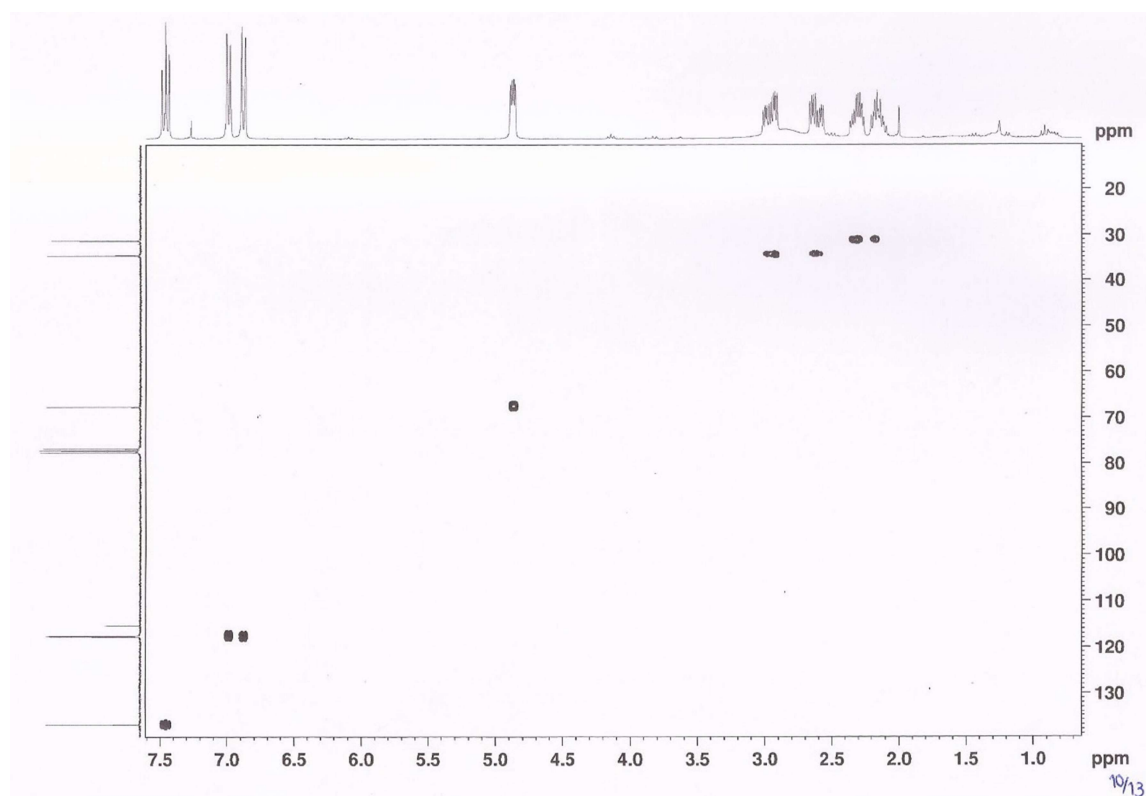

**Figure S46.** HMBC spectrum of **7** (CDCl<sub>3</sub>, 300 MHz).

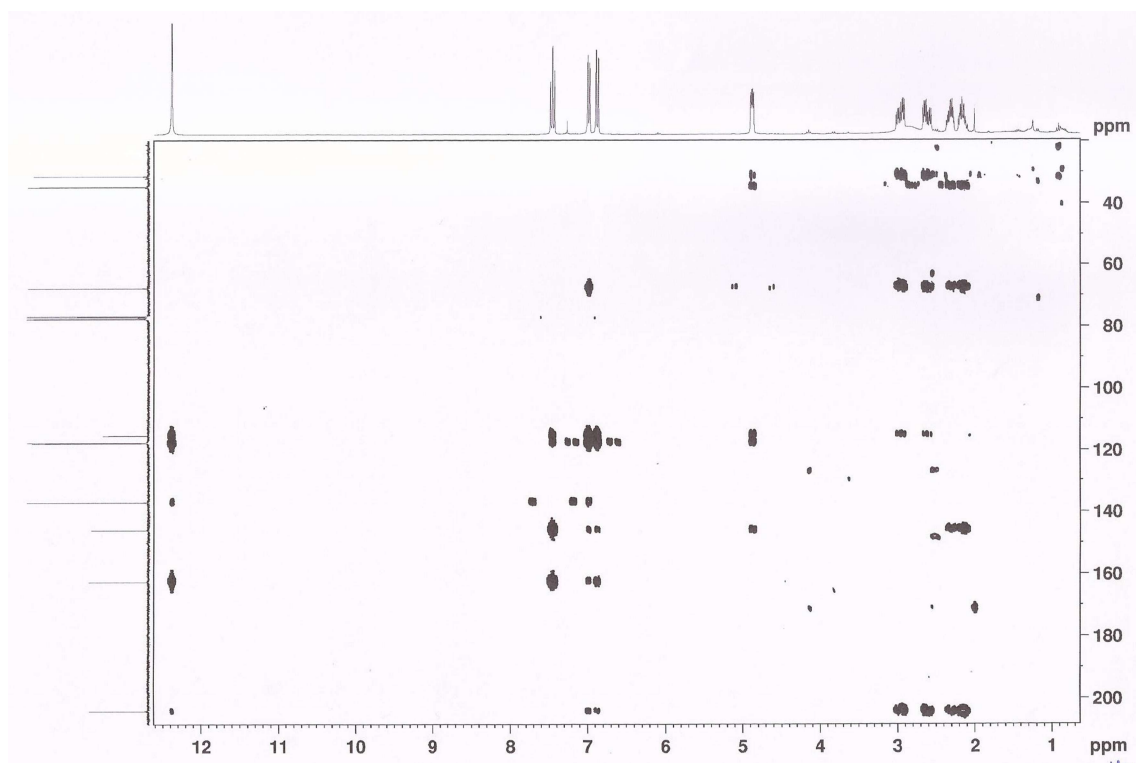

**Table S1.** <sup>1</sup>H and <sup>13</sup>C NMR data (CDCl<sub>3</sub>, 300 and 75 MHz), COSY and HMBC for **3**.

| Position | δ <sub>C</sub> , type | δ <sub>H</sub> , (J in Hz) | COSY                      | HMBC                    |
|----------|-----------------------|----------------------------|---------------------------|-------------------------|
| 1        | 171.5, CO             |                            |                           |                         |
| 3        | 91.6, C               |                            |                           |                         |
| 3a       | 146.2, C              |                            |                           |                         |
| 4        | 114.5 C               |                            |                           |                         |
| 5        | 165.8, C              |                            |                           |                         |
| 6        | 99.0, CH              | 6.49, s                    | H <sub>3</sub> -11, OMe-5 | C-1, 4, 5, 7, 7a        |
| 7        | 156.6, C              |                            |                           |                         |
| 7a       | 102.2, C              |                            |                           |                         |
| 8        | 202.8, CO             |                            |                           |                         |
| 9        | 24.1 CH <sub>3</sub>  | 2.06, s                    |                           | C-8                     |
| 10       | 20.1, CH <sub>3</sub> | 1.78, s                    |                           | C-3, 3 <sup>a</sup> , 8 |
| 11       | 10.0, CH <sub>3</sub> | 2.04, s                    | H-6                       | C-3a, 4, 5              |
| OMe-5    | 56.4, CH <sub>3</sub> | 3.89, s                    | H-6                       | C-5                     |
| OH-7     | 7.81, brs             |                            |                           |                         |



**Table S2.**  $^1\text{H}$  and  $^{13}\text{C}$  NMR (300 and 75 MHz,  $\text{CDCl}_3$ ), COSY and HMBC of **4a**.

| Position | $\delta_{\text{C}}$ , type | $\delta_{\text{H}}$ , (J in Hz) | COSY              | HMBC           |
|----------|----------------------------|---------------------------------|-------------------|----------------|
| 1        | 171.6, CO                  |                                 |                   |                |
| 3        | 92.0, C                    |                                 |                   |                |
| 3a       | 150.0, C                   |                                 |                   |                |
| 4        | 112.2, C                   |                                 |                   |                |
| 5        | 165.3, C                   |                                 |                   |                |
| 6        | 98.3, CH                   | 6.40, s                         |                   | 1, 4, 5, 7, 7a |
| 7        | 156.4, C                   |                                 |                   |                |
| 7a       | 103.0, C                   |                                 |                   |                |
| 8        | 70.7, CH                   | 4.20, m                         | H <sub>3</sub> -9 |                |
| 9        | 17.6, CH <sub>3</sub>      | 0.89, d (6.5)                   | H-8               | C-3, 8         |
| 10       | 21.2, CH <sub>3</sub>      | 1.76, s                         |                   | C-3, 3a, 8     |
| 11       | 11.2, CH <sub>3</sub>      | 2.07, s                         |                   | C-3a, 4, 5     |
| OMe-5    | 56.3 OCH <sub>3</sub> ,    | 3.83, s                         |                   | C-5            |
| OH-7     | -                          | 7.93, br                        |                   |                |
| OH-8     |                            | 2.73, br                        |                   |                |

**Table S3.** Comparison of  $^1\text{H}$  and  $^{13}\text{C}$  NMR data of **4a** (300 and 75 MHz,  $\text{CDCl}_3$ ) with those of (*R*)-7-hydroxy-3-((*R*)-1-hydroxyethyl)-5-methoxy-3,4-dimethylisobenzofuran-1(3*H*)-one (400 and 100 MHz,  $\text{CDCl}_3$ ) and (*R*)-7-hydroxy-3-((*S*)-1-hydroxyethyl)-5-methoxy-3,4-dimethylisobenzofuran-1(3*H*)-one (500 and 125 MHz,  $\text{CDCl}_3$ )

|          | <b>4a</b>                  |                                 | ( <i>R</i> )-7-hydroxy-3-(( <i>R</i> )-1-hydroxyethyl)-5-methoxy-3,4-dimethylisobenzofuran-1(3 <i>H</i> )-one |                                 | ( <i>R</i> )-7-hydroxy-3-(( <i>S</i> )-1-hydroxyethyl)-5-methoxy-3,4-dimethylisobenzofuran-1(3 <i>H</i> )-one |                                 |
|----------|----------------------------|---------------------------------|---------------------------------------------------------------------------------------------------------------|---------------------------------|---------------------------------------------------------------------------------------------------------------|---------------------------------|
| Position | $\delta_{\text{C}}$ , type | $\delta_{\text{H}}$ , (J in Hz) | $\delta_{\text{C}}$ , type                                                                                    | $\delta_{\text{H}}$ , (J in Hz) | $\delta_{\text{C}}$ , type                                                                                    | $\delta_{\text{H}}$ , (J in Hz) |
| 1        | 171.6, CO                  |                                 | 171.7, CO                                                                                                     |                                 | 171.5, CO                                                                                                     |                                 |
| 3        | 92.0, C                    |                                 | 92.1, C                                                                                                       |                                 | 91.3, C                                                                                                       |                                 |
| 3a       | 150.0, C                   |                                 | 150.1, C                                                                                                      |                                 | 149.9                                                                                                         |                                 |
| 4        | 112.2, C                   |                                 | 112.5, C                                                                                                      |                                 | 112.2, C                                                                                                      |                                 |
| 5        | 165.3, C                   |                                 | 165.6, C                                                                                                      |                                 | 165.4, C                                                                                                      |                                 |
| 6        | 98.3, CH                   | 6.40, s                         | 98.5, CH                                                                                                      | 6.41, s                         | 98.2, CH                                                                                                      | 6.43, s                         |
| 7        | 156.4, C                   |                                 | 156.8, C                                                                                                      |                                 | 156.5, C                                                                                                      |                                 |
| 7a       | 103.0, C                   |                                 | 103.3, C                                                                                                      |                                 | 103.0, C                                                                                                      |                                 |
| 8        | 70.7, CH                   | 4.20, m                         | 71.2, C                                                                                                       | 4.19, q (6.5)                   | 70.9, CH                                                                                                      | 4.22, m                         |
| 9        | 17.6, CH <sub>3</sub>      | 0.89, d (6.5)                   | 18.1, CH <sub>3</sub>                                                                                         | 0.91 d (6.5)                    | 17.5, CH <sub>3</sub>                                                                                         | 0.93, d (6.8)                   |
| 10       | 21.2, CH <sub>3</sub>      | 1.76, s                         | 21.5, CH <sub>3</sub>                                                                                         | 1.78, s                         | 21.3, CH <sub>3</sub>                                                                                         | 1.81, s                         |
| 11       | 11.2, CH <sub>3</sub>      | 2.07, s                         | 11.4, CH <sub>3</sub>                                                                                         | 2.09, s                         | 11.2, CH <sub>3</sub>                                                                                         | 2.11, s                         |
| OMe-5    | 56.3, CH <sub>3</sub>      | 3.83, s                         | 56.5, CH <sub>3</sub>                                                                                         | 3.85, s                         | 56.3, CH <sub>3</sub>                                                                                         | 3.88, s                         |

|      |   |          |   |       |   |                |
|------|---|----------|---|-------|---|----------------|
| OH-7 | - | 7.93, br | - | 7.84, | - | 7.88           |
| OH-8 |   | 2.73, br |   |       |   | 1.97, d (10.3) |

**Table S4.**  $^1\text{H}$  and  $^{13}\text{C}$  NMR data (DMSO- $d_6$ , 300 and 75 MHz), COSY and HMBC for 7.

| Position | $\delta_{\text{C}}$ , type | $\delta_{\text{H}}$ , ( $J$ in Hz)                       | COSY   | HMBC                    |
|----------|----------------------------|----------------------------------------------------------|--------|-------------------------|
| 1        | 204.4, CO                  |                                                          |        |                         |
| 2        | 34.6, CH <sub>2</sub>      | 2.96, ddd (17.9, 8.1, 4.8)<br>2.61, ddd (17.9, 8.3, 4.8) | H-3    | C-1, 3, 4, 8a           |
| 3        | 31.2, CH <sub>2</sub>      | 2.16, m<br>2.32, m                                       | H-2, 4 | C-1, 2, 4, 4a           |
| 4        | 67.6, CH                   | 4.88, dd (7.3, 3.7)                                      | H-3    | C-2, 3, 4a, 5, 8a       |
| 4a       | 145.9, C                   |                                                          |        |                         |
| 5        | 117.5, CH                  | 6.99, d (7.4)                                            | H-6    | C-1, 4, 4a, 6, 7, 8, 8a |
| 6        | 137.0, CH                  | 7.46, dd (8.3, 7.4)                                      | H-5, 7 | C-4a, 5, 7, 8, 8a       |
| 7        | 117.7, CH                  | 6.88, d (8.3)                                            | H6-    | C-4, 4a, 5, 8, 8a       |
| 8        | 162.6, C                   |                                                          |        |                         |
| 8a       | 115.2, C                   |                                                          |        |                         |
| OH-8     | -                          | 12.39, s                                                 |        | C-6, 7, 8, 8a           |
